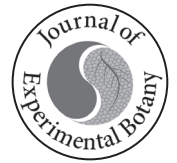

RESEARCH PAPER

# Identification of rice cornichon as a possible cargo receptor for the Golgi-localized sodium transporter OsHKT1;3

Paul Rosas-Santiago<sup>1,2</sup>, Daniel Lagunas-Gómez<sup>1</sup>, Bronwyn J. Barkla<sup>3</sup>, Rosario Vera-Estrella<sup>1</sup>, Sylvie Lalonde<sup>2</sup>, Alexander Jones<sup>2</sup>, Wolf B. Frommer<sup>2</sup>, Olga Zimmermannova<sup>3</sup>, Hana Sychrová<sup>4</sup> and Omar Pantoja<sup>1,†</sup>

<sup>1</sup> Instituto de Biotecnología, Universidad Nacional de Autónoma de México, Cuernavaca, Morelos 62250, México

<sup>2</sup> Department of Plant Biology, Carnegie Institution for Science, Stanford, CA 94305, USA

<sup>3</sup> Southern Cross Plant Science, Southern Cross University, Lismore, Australia

<sup>4</sup> Department of Membrane Transport, Institute of Physiology, Academy of Sciences of the Czech Republic, v.v.i., 142 20 Prague 4, Czech Republic

† To whom correspondence should be addressed. E-mail: [omar@ibt.unam.mx](mailto:omar@ibt.unam.mx)

Received 4 November 2014; Revised 27 January 2015; Accepted 30 January 2015

## Abstract

Membrane proteins are synthesized and folded in the endoplasmic reticulum (ER), and continue their path to their site of residence along the secretory pathway. The COPII system has been identified as a key player for selecting and directing the fate of membrane and secretory cargo proteins. Selection of cargo proteins within the COPII vesicles is achieved by cargo receptors. The cornichon cargo receptor belongs to a conserved protein family found in eukaryotes that has been demonstrated to participate in the selection of integral membrane proteins as cargo for their correct targeting. Here it is demonstrated at the cellular level that rice cornichon OsCNIH1 interacts with OsHKT1;3 and, in yeast cells, enables the expression of the sodium transporter to the Golgi apparatus. Physical and functional HKT–cornichon interactions are confirmed by the mating-based split ubiquitin system, bimolecular fluorescence complementation, and *Xenopus* oocyte and yeast expression systems. The interaction between the two proteins occurs in the ER of plant cells and their co-expression in oocytes leads to the sequestration of the transporter in the ER. In the yeast cornichon mutant *erv14*, OsHKT1;3 is mistargeted, preventing the toxic effects of sodium transport in the cell observed in wild-type cells or in the *erv14* mutant that co-expressed OsHKT1;3 with either OsCNIH1 or *Erv14p*. Identification and characterization of rice cornichon as a possible cargo receptor opens up the opportunity to improve our knowledge on membrane protein targeting in plant cells.

**Key words:** Cornichon, endoplasmic reticulum, Golgi, OsHKT1;3, protein–protein interaction.

## Introduction

Membrane transport proteins have to be selectively targeted to specific membranes to control ion and metabolite fluxes into and within the cell. However, very little is known about the sorting mechanisms of plant transporters. During evolution, eukaryotic cells developed multiple systems to target proteins to their respective compartments. Once membrane proteins are synthesized and folded in the endoplasmic

reticulum (ER), they are directed by specific protein–protein interactions through the secretory pathway to the site where they will finally dwell. Transport of membrane and secretory cargo proteins is mediated by COPII vesicles that help to select these cargoes from ER-resident proteins. In yeast, humans, and plants, there is evidence that selection of cargo proteins is mediated specifically by the Sec24 subunit of the

COPII complex (Miller *et al.*, 2002; Mossessova *et al.*, 2003; Mancias and Goldberg, 2008; Faso *et al.*, 2009; Conger *et al.*, 2011). Conserved domains involved in cargo selection have been identified (Miller *et al.*, 2003; Mossessova *et al.*, 2003). Accessory proteins known as cargo participate in the selection of specific cargo that can be either soluble or membrane proteins destined for different organelle or vesicular membranes (Dancourt and Barlowe, 2010). Correct targeting of membrane proteins, in particular ion transporters, is important for controlling ion homeostasis within the cell. Participation of cargo receptors is proposed to increase the specificity of the secretory pathway, with a particular receptor recognizing a specific cargo to be delivered to a precise cellular site of residence (Dancourt and Barlowe, 2010). In yeast, the role of Erv proteins (endoplasmic reticulum vesicle proteins) as cargo receptors is indicated by their association with COPI and COPII vesicles, their cycling between the ER and Golgi, and the selective inhibition of cargo transport with the deletion of a particular Erv cargo receptor (Belden and Barlowe, 2001). For example, Erv29p has been demonstrated to select soluble secretory proteins such as carboxypeptidase Y and proteinase A (Belden and Barlowe, 2001; Otte and Barlowe, 2004), while Erv26p is involved in the export of membrane proteins such as alkaline phosphatase and mannosyltransferase (Bue *et al.*, 2006; Bue and Barlowe, 2009). In contrast, Erv14p participates in the ER export of membrane proteins through ER lumen-localized sorting signals (Powers and Barlowe, 1998, 2002). Yeast Erv14p is a well conserved protein found in eukaryotes, initially identified in *Drosophila* as cornichon (Roth *et al.*, 1995), and later in mammals where it was found to be associated with glutamate receptors of the AMPA subtype (Schwenk *et al.*, 2009). In plants, there is little information on the possible role of supplementary cargo receptors in the secretory pathway, with the exception of vacuolar cargo receptor proteins directly involved in the selection of soluble proteins for their delivery to the vacuole lumen (Sanderfoot *et al.*, 1998; Tse *et al.*, 2004; Wang *et al.*, 2011). However, it has been demonstrated in plant transporters that the presence of diacidic (Mikosch *et al.*, 2006; Dunkel *et al.*, 2008) or dileucine motifs (Komarova *et al.*, 2012; Wolfenstetter *et al.*, 2012) or loops between transmembrane domains (Komarova *et al.*, 2012) is important for the correct delivery to the target membrane.

While the acronym HKT for high-affinity K<sup>+</sup> transporter implies that members of the family transport K<sup>+</sup>, the majority of these proteins play a more significant role in low-affinity Na<sup>+</sup> transport and have been identified as key players in salt tolerance (Plett *et al.*, 2010; Munns *et al.*, 2012; Schroeder *et al.*, 2013). Yet, knowledge of the regulation of these transporters is limited. HKT transporters form two distinct subfamilies. Members of subfamily 1 are associated with Na<sup>+</sup> tolerance based on their expression in the parenchyma cells of the xylem where they remove Na<sup>+</sup> from the root xylem (Uozumi *et al.*, 2000; Ren *et al.*, 2005; Sunarpi *et al.*, 2005) or the leaf sheath (Cotsaftis *et al.*, 2012; Munns *et al.*, 2012), preventing its transport to the leaf blade. Alternatively, they may participate in Na<sup>+</sup> recirculation from the leaves to the

root along the phloem (Berthomieu *et al.*, 2003). The specific overexpression of *AtHKT1;1* in the root stele of *Arabidopsis thaliana* (Møller *et al.*, 2009) or rice (*Oryza sativa*) (Plett *et al.*, 2010) caused a decreased Na<sup>+</sup> transport to the shoot, with a consequent lower accumulation of Na<sup>+</sup> in the leaves and higher fresh weight, and resulting in an increase in salinity tolerance. Members of subfamily 2 probably participate in ion absorption (Rubio *et al.*, 1995; Horie *et al.*, 2001, 2007; Yao *et al.*, 2010), as indicated by their localization at the plasma membrane (Horie *et al.*, 2007, 2011; Lan *et al.*, 2010; Xue *et al.*, 2011).

In *A. thaliana*, only a single member of the HKT family, *AtHKT1;1*, is present (Uozumi *et al.*, 2000), while the rice genome contains nine HKT genes, one of them probably a pseudo-gene (Garcia-deblás *et al.*, 2003). The presence of more than one HKT gene in rice, with members from the two subfamilies, indicates that the corresponding proteins must play particular roles in the physiology of the plant, either by expression in a particular tissue or organelle, or by presenting unique transport properties. Previous studies have confirmed this view, with members from the two subfamilies showing differences in ion selectivity (Horie *et al.*, 2001, 2011; Golldack *et al.*, 2002; Jabnourne *et al.*, 2009; Yao *et al.*, 2010; Sassi *et al.*, 2012) and differential gene expression profiles in plant tissues (Golldack *et al.*, 2002; Kader *et al.*, 2006; Jabnourne *et al.*, 2009).

*OsHKT1;3* functions as a highly selective Na<sup>+</sup> transporter and its transcript is expressed in the vascular tissue of roots and leaves. The high expression in leaf adaxial epidermal bulbiform cells has been used to propose its involvement in turgor changes for rolling and unrolling of leaves in response to environmental variations (Jabnourne *et al.*, 2009). Of particular interest is the high Na<sup>+</sup> selectivity of *OsHKT1;3* which, if not unique among HKTs, raises the question of the role of such a mechanism, in view of the toxic effects that sodium has on glycophytes, such as rice, and its widespread expression in the plant (Jabnourne *et al.*, 2009). To study the regulation of *OsHKT1;3*, interacting proteins that might regulate its activity/trafficking were searched for employing a large-scale protein–protein interaction screen based on the mating-based split ubiquitin system (mbSUS) (Lalonde *et al.*, 2010; Chen *et al.*, 2012; Jones *et al.*, 2014). In this screen, a plant homologue of the putative cargo receptor, cornichon, was identified. Here the characteristics of rice cornichon are reported at the cellular level, together with its interaction with *OsHKT1;3* as a cargo protein, and the intracellular localization of *OsHKT1;3* to the Golgi system where it may function as the shunt conductance for the H<sup>+</sup> pumps that acidify this organelle.

## Materials and methods

### Mating-based split ubiquitin system (mbSUS)

For PCR amplification of the open reading frame (ORF) for *OsHKT1;3* and *OsCNIH1* genes without their stop codon, the primers described in Supplementary Table S1 available at JXB online were employed. Entry clones were generated with the pENTR-TOPO vector/plasmid following the manufacturer's instructions (Invitrogen). The integrity

of gene insertion was confirmed by sequencing and by digestion with *PvuII* (Roche). The LR clonase (Invitrogen) was employed to transfer the *OsHKT1;3* and *OsCNIH1* genes to the pMETYC\_GW (Cub clones) and pXN32\_GW (Nub clones) vectors, respectively. Yeast media were prepared as previously described (Lalonde *et al.*, 2010). The THY.AP4 (*MATa ura3, leu2, lexA::LacZ::trp1 lexA::HIS3 lexA::ADE2*) and THY.AP5 (*MATa URA3, leu2, trp1, his3 loxP::ade2*) yeast strains were transformed with the pMETYC\_GW and pXN32\_GW vectors, respectively (Obrdlik *et al.*, 2004), employing the LiAc protocol previously described (Lalonde *et al.*, 2010). Cub clones were pre-screened to identify false-positive and false-negative fusions. Those fusions that did not interact with the soluble NubWT, that has a strong affinity for the Cub domain, were considered as false negatives; while those that did interact with the NubG (with reduced affinity for Cub) corresponded to false positives. Those Cub fusions that passed the pre-screening were used with the *A. thaliana* membrane-linked interactome protein library Nub clones. Positive interactors were chosen by the similar growth shown to the soluble NubWT in IS-500 medium (Lalonde *et al.*, 2010).

#### Transitory expression of *OsHKT1;3* and *OsCNIH1* tagged with fluorescent proteins in *Nicotiana benthamiana* leaf epidermis

For the transitory transformation of *N. benthamiana* leaves, plants were grown in the glasshouse from seeds in pots containing Metromix 500 soil (SunGro) at 25 °C under natural light conditions. Leaves from 4-week-old plants were infiltrated with *Agrobacterium tumefaciens* harbouring either the p*OsHKT1;3*-EYFP, p*OsHKT1;3*-mCherry, or p*OsCNIH1*-mCherry constructs under the control of the 35S promoter and/or the indicated subcellular marker gene constructions (Nelson *et al.*, 2007). For bimolecular fluorescence complementation (BiFC) experiments, leaf infiltration was done using the constructs pYFC43-*OsHKT1;3*, pYFC43-*OsCNIH1*, pYFC43-*AtPIP2A*, pYFN43-*OsHKT1;3*, pYFN43-*OsCNIH1*, and pYFN43-*AtPIP2A* (Belda-Palazón *et al.*, 2012). *Agrobacterium tumefaciens* containing each construct were grown in 30 ml of LB with rifampicin (50 µg ml<sup>-1</sup>) and spectinomycin (50 µg ml<sup>-1</sup>) or kanamycin (5050 µg ml<sup>-1</sup>) at 28 °C at an OD<sub>600</sub> between 0.3 and 0.5. Leaves were infiltrated with a solution containing sodium phosphate buffer pH 7, 0.1 mM acetosyringone (Sigma), 28 mM glucose, and bacterial culture with an OD<sub>600</sub> of 0.3. To obtain the expression clone for each gene, an LR gateway-based recombination reaction (Invitrogen) with either pX-EYFP-GW or pX-Cherry-GW for C-terminal translational fusions, or pYFC43 and pYFN43 for BiFC assays, were achieved. Transformed electrocompetent cells of the strain GV3101 of *A. tumefaciens* with each of these constructions were used for expression in tobacco. Image J software (<http://imagej.nih.gov/ij/>) was used to analyse the confocal images for co-localization. Pearson's coefficient and scatter plots were obtained using the JACoP Plug-in (Bolte and Cordelières, 2006).

#### Functional expression of *OsHKT1;3* in *Xenopus oocytes*

The two-electrode voltage-clamp technique was used to record the activity of *OsHKT1;3* and *OsCNIH1*, individually or co-expressed in oocytes 2 d after cRNA injection as described (Ortiz-Ramirez *et al.*, 2011). For all measurements, oocytes were clamped at their free running membrane potential. The reported results are the means ±SD of 5–10 oocytes. For expressing *OsHKT1;3* and *OsCNIH1* in *Xenopus oocytes*, both genes were cloned into the pOO2 oocyte expression vector (Ludewig *et al.*, 2002) employing the primers described in Supplementary Table S1 at JXB online. An *OsHKT1;3*-EGFP fusion protein was made by adding the ORF of the enhanced green fluorescent protein (pEGFP-C1; Clontech) at the C-terminus of *OsHKT1;3* which was then subcloned into pOO2. Clones were verified by sequencing. Capped cRNA was transcribed *in vitro* by SP6 RNA polymerase using the mMessage mMachine kit (Ambion), after linearization of the plasmid with Bbr P1 (Roche).

#### Heterologous expression of *OsHKT1;3* in yeast

*OsHKT1;3* was amplified by PCR employing the primers described in Supplementary Table S1 at JXB online. The PCR-amplified *OsHKT1;3* gene was inserted into the YEp352-NHA1-URA and pGRU1-NHA1-URA vectors (previously digested with *PstI* and *PvuII*, respectively) behind the *Saccharomyces cerevisiae* NHA1 promoter (Kinclová *et al.*, 2001) using homologous recombination in *S. cerevisiae* BW31a cells (*MATa leu2-3/122 ura3-1 trp1-1 his3-11/15 ade2-1 can1-100 GAL SUC2 mal10 ena1-4A::HIS3 nha1::LEU2*). The resulting vectors were pYEp352-*OsHKT1;3* and pGRU1-*OsHKT1;3*. The correct constructions were confirmed by sequencing using oligos described in Supplementary Table S1. *OsCNIH1* and *ERV14* cloned in pENTR-TOPO were transferred to pDR-F1-GW-LEU by an LR reaction (Invitrogen). pDR-F1-*OsCNIH1* and pDR-F1-*ERV14* constructs are under control of the *PMAl* promoter. Constructions were verified by *PvuII* digestion (Thermo Scientific). The *S. cerevisiae* BY4741 strain (*MATa his3Δleu2Δmet15Δura3Δ*) was used to determine NaCl sensitivity in drop-test assays. Yeast cells were grown aerobically at 30 °C in standard YPD (to prepare competent cells for transformation) or Yeast Nitrogen Base (YNB) media without amino acids (to select and maintain transformants), with 2% glucose as carbon source and appropriate auxotrophic supplements. The growth phenotype of cells was estimated in drop tests on solid YNB medium supplemented with NaCl after 4 d. The *ERV14* gene was deleted by homologous recombination using the KanMX marker gene and the Cre-loxP system-producing strain BY4741Δ*erv14* (Supplementary Fig. S1). Primers used are described in Supplementary Table S2.

#### Fluorescence microscopy

Fluorescence from EYFP was visualized by excitation with an Argon laser at 514 nm with the spectral detector set between 540 nm and 30 nm for the emission. The wavelengths employed for Citrine and mCherry were 488 nm and 543 nm (excitation), and 515/30 nm and 630/60 nm (emission), respectively. Abaxial epidermal peels of mature leaves were placed onto microscope slides in water, covered with a cover slide, and observed by fluorescence microscopy using an inverted multiphoton confocal microscope (Olympus FV1000) equipped with a ×60 oil immersion objective. Results are representative images from >10 cells from at least four different independent transformations.

## Results

### Analysis of protein–protein interactions between *OsHKT1;3* and the Arabidopsis membrane interactome

In order to obtain additional information on the functioning of *OsHKT1;3*, the possible regulation of the transporter through protein–protein interactions was studied by employing the mbSUS (Obrdlik *et al.*, 2004; Lalonde *et al.*, 2010). Screening an *A. thaliana* membrane-linked interactome protein library as prey (Nub clones), with *OsHKT1;3* protein used as bait (Cub clone) (Lalonde *et al.*, 2010; Jones *et al.*, 2014), 19 possible interactions were identified, as indicated by growth of diploid yeast cells under selective conditions (Table 1). These interactions were common to two other rice HKTs, *OsHKT1;1* and *OsHKT2;1* (Table 1).

### *OsHKT1;3* interacts with *OsCNIH1* in yeast

After analysing the 19 interacting proteins, it was decided to focus on a protein homologous to Erv14p in yeast and cornichon in *Drosophila* and mammals, which has been shown to direct the trafficking of membrane proteins from the ER to the Golgi

**Table 1.** *Arabidopsis* proteins interacting with *OsHKT1;3*

*Arabidopsis* proteins identified with the mbSUS employing *OsHKT1;3* as bait (Cub clone) and the *Arabidopsis* interactome (Nub clones) (Jones *et al.*, 2014) as prey.

| OsHKT1;3 (Cub) | AGs <i>Arabidopsis</i> (Nub) | Description                                                                                            |
|----------------|------------------------------|--------------------------------------------------------------------------------------------------------|
| Os02g07830     | AT3G17000                    | Ubiquitin-conjugating enzyme 32                                                                        |
|                | AT3G25805                    | Unknown protein                                                                                        |
|                | AT1G17280                    | Ubiquitin-conjugating enzyme 34                                                                        |
|                | AT1G21240                    | Cell wall-associated kinase                                                                            |
|                | AT1G34640                    | Unknown protein                                                                                        |
|                | AT1G47640                    | Unknown protein                                                                                        |
|                | AT1G63110                    | Cell division cycle protein-related                                                                    |
|                | AT2G26180                    | IQ-domain 6 (IQD6)                                                                                     |
|                | AT3G08040                    | Member of the MATE family                                                                              |
|                | AT3G10640                    | VPS60 vesicle-mediated transport                                                                       |
|                | AT3G12180                    | Cornichon family protein                                                                               |
|                | AT3G28220                    | Meprin and TRAF homology domain-containing protein                                                     |
|                | AT4G30850                    | Heptahelical transmembrane protein homologous to human adiponectin receptors and progesterin receptors |
|                | AT5G06100                    | myb family of transcription factors (MYB33)                                                            |
|                | AT5G06320                    | Tobacco hairpin-induced gene (HIN1)                                                                    |
|                | AT5G10450                    | 14-3-3 gene family                                                                                     |
|                | AT5G37050                    | Unknown protein                                                                                        |
|                | AT5G49540                    | Unknown protein                                                                                        |
|                | AT5G52240                    | Similar to progesterone-binding proteins in animals.                                                   |

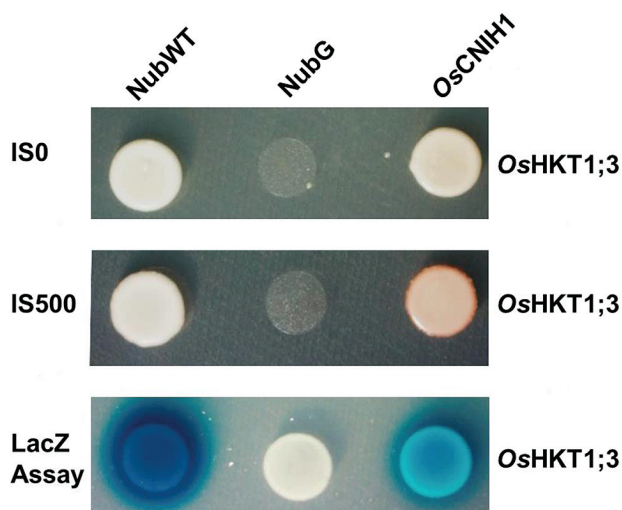

**Fig. 1.** Homologous interaction between *OsHKT1;3* and *OsCNIH1*. Homologous interaction between *OsHKT1;3* and *OsCNIH1* confirmed with the mbSUS in yeast with selective medium in the absence (IS0) or in the presence of methionine (0.5 mM; IS500). Corroboration of the interaction between *OsHKT1;3* and *OsCNIH1* was demonstrated by activation of LacZ and revealed with X-Gal as a substrate. Representative results of three different assays are shown.

apparatus (Gillingham *et al.*, 2004), or to the plasma membrane (Schwenk *et al.*, 2009; Herzig *et al.*, 2012). Confirmation of the interaction between *OsHKT1;3* and rice cornichon (*OsCNIH1*; Os06g04500) was obtained by employing *OsHKT1;3* and *OsCNIH1* as Cub and Nub clones, respectively, in the mbSUS. Growth of diploid yeast cells in selective medium confirmed the interaction between *OsHKT1;3* and *OsCNIH1* (Fig. 1; IS0), and the strength of the interaction was demonstrated by growth

of the diploid cells in the presence of 0.5 mM methionine which acts as a repressor of the pMETYC promoter (Grefen *et al.*, 2007; Fig. 1, IS500). As expected, *OsHKT1;3* did not interact with soluble NubG, but it did with soluble NubWT, that were used as false-positive and false-negative controls, respectively (Fig. 1). Additional confirmation of the interaction between *OsHKT1;3* and *OsCNIH1* was derived from analysing LacZ activity with X-Gal as a substrate, whereby clear blue signals in the diploid cells harbouring *OsHKT1;3* and *OsCNIH1* clones were observed. The blue precipitate was also observed with the positive control (soluble NubWT), but not with soluble NubG, the negative control (Fig. 1, LacZ).

#### Sequence analysis of rice cornichon

The rice genome contains two cornichons, *OsCNIH1* (Os06g04500), a small hydrophobic protein of 135 amino acids (Fig. 2A, B), and *OsCNIH2* (Os12g32180), which encodes a slightly larger protein (149 amino acids; Fig. 2B). The two isoforms share 44% identity at the amino acid level. Cornichon belongs to a family of membrane proteins unique to eukaryotes that is predicted to have three membrane-spanning  $\alpha$ -helices (Fig. 2A, Kyte–Doolittle; Fig. 2B, TMHMM, black lines), with the N-terminus towards the cytoplasm according to the predicted positive-inside rule (von Heijne, 1992), and the C-terminus located in the ER lumen. All plant cornichon homologues possess an acidic domain in the luminal C-terminus (Fig. 2B, red line). The similarity between plants, yeast, fly, worm, zebra fish, and human cornichons is ~40%, with *OsCNIH1* showing higher identity with the *Arabidopsis* homologues *AtCNIH2*, *AtCNIH3*, and *AtCNIH4* (Fig. 2C).

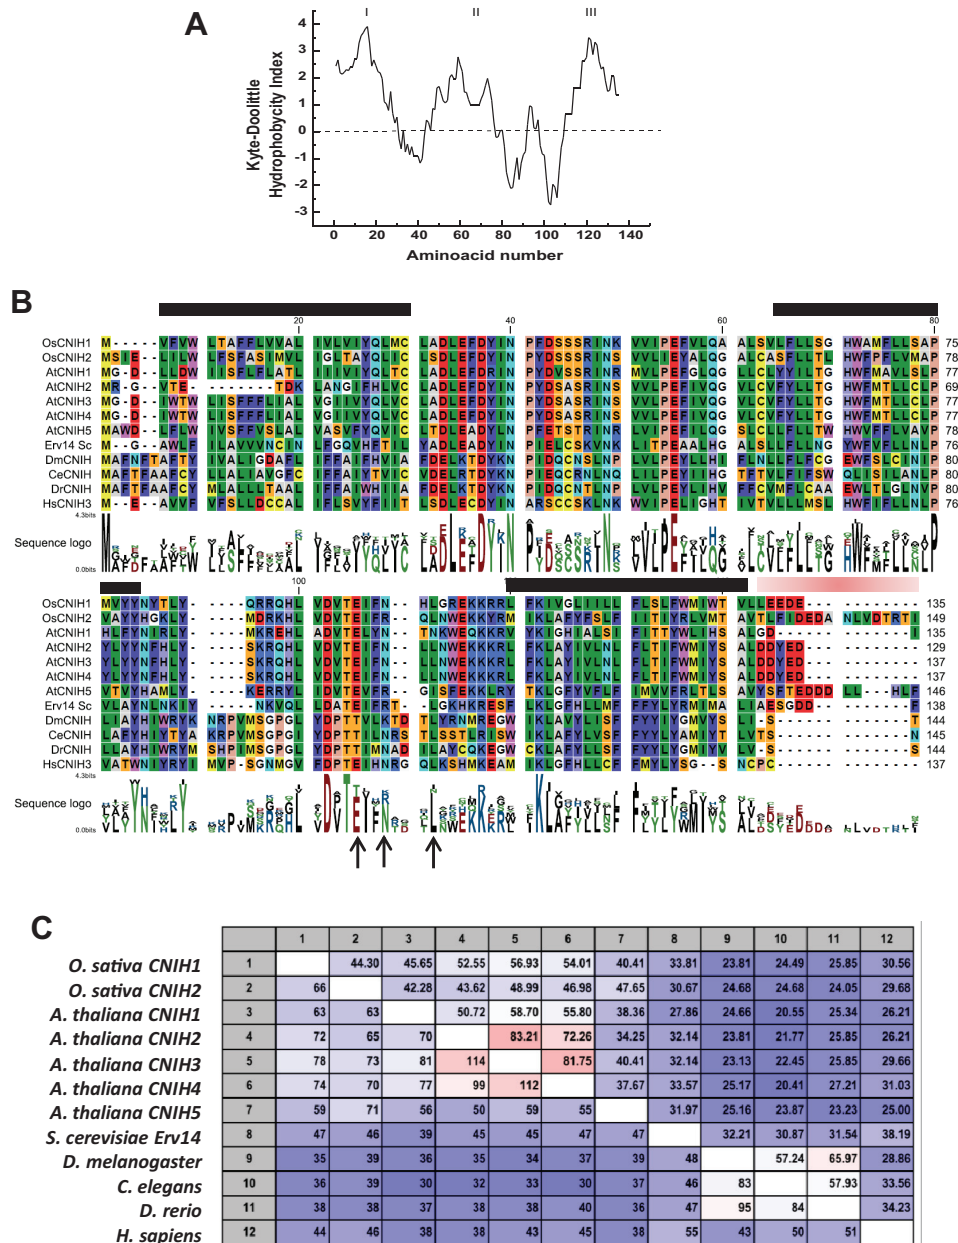

**Fig. 2.** OsCNIH1 sequence analysis. (A) A Kyte–Doolittle hydropathy plot shows three potential transmembrane domains (I, II, and III; values >0) in OsCNIH1. (B) Sequence alignment of OsCNIH1 with OsCNIH2, AtCNIH1, AtCNIH2, AtCNIH3, AtCNIH4, AtCNIH5, ScErv14, and cornichon homologues from *Drosophila* (*Drosophila melanogaster*), worm (*Caenorhabditis elegans*), zebra fish (*Danio rerio*), and human isoform 4 (*Homo sapiens*). Accession numbers are Os06g04500, Os12g32180, At4g12090, At1g12340, At1g12390, At1g62880, At3g12180, YGL054C Erv14, NP\_477068, CABO1516, NP\_001028278, and NP\_001264129.1, respectively. Black bars indicate putative transmembrane domains; arrows indicate conserved residues involved in binding to COPII in yeast (I96, F97, and L100); the grey bar denotes an acidic domain. (C) Pairwise comparison between the cornichon proteins listed in (B) shows the percentage identity (upper right values) and number of identical residues (bottom left values). (This figure is available in colour at JXB online.)

### Split-YFP analyses demonstrate that OsHKT1;3 and OsCNIH1 interact in the ER

To confirm the interaction between *OsHKT1;3* and *OsCNIH1* in planta, and to identify the site(s) of interaction, the split-YFP (yellow fluorescent protein) system was employed by fusing the N-terminal half of *EYFP* to the N-terminal half of *OsHKT1;3* (YFN-*OsHKT1;3*) and the C-terminus of *EYFP* to the N-terminus of *OsCNIH1* (YFC-*OsCNIH1*). Co-expressing these constructs in tobacco leaves led to fluorescence recovery of *EYFP* (Fig. 3A), indicating the association between *OsHKT1;3*

and *OsCNIH1* at the ER, according to the reticulated structure highlighted by EYFP. The co-localization of the two proteins was confirmed with fusions of the N- and C-terminal halves of *EYFP* to the N-terminus of *OsCNIH1* (YFN-*OsCNIH1*) or *OsHKT1;3* (YFC-*OsHKT1;3*), respectively (Fig. 3E). As a positive control for the BiFC assay, the well-known tetramerization of the plasma membrane aquaporin *AtPIP2A* was used. For this, the N- or C-terminal halves of *EYFP* were fused to the N-terminus of the aquaporin *AtPIP2A* (YFN-*AtPIP2A* and YFC-*AtPIP2A*). As expected, oligomerization of the aquaporin was observed at the plasma membrane (Fig. 3I). Co-expression

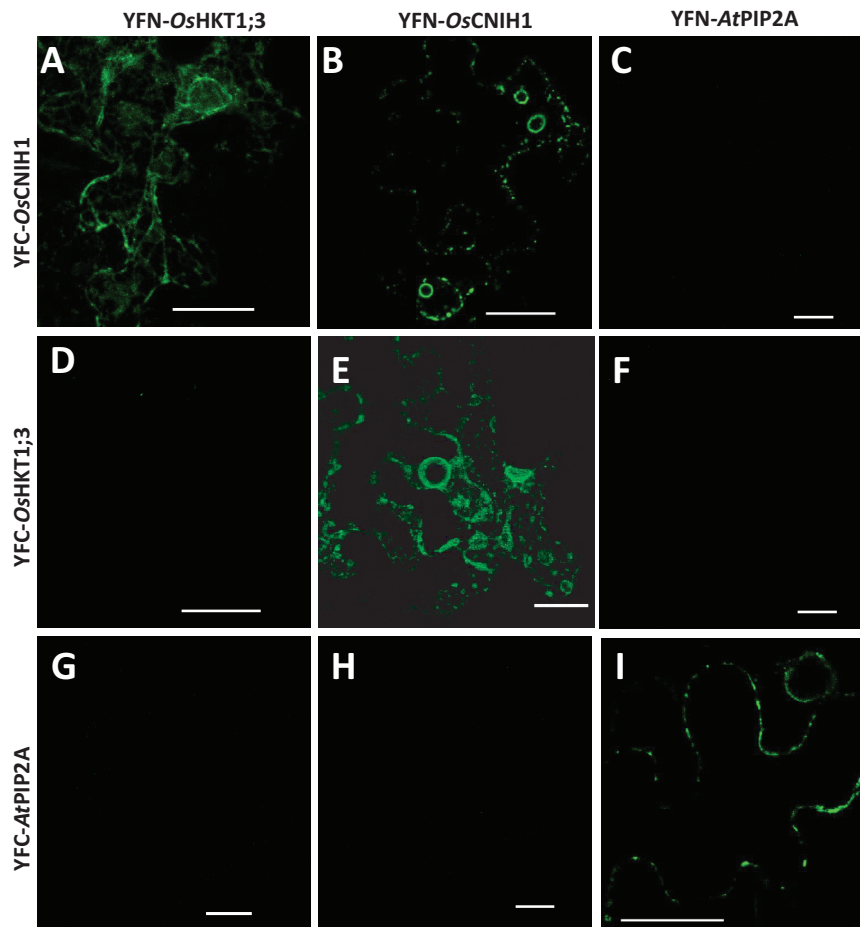

**Fig. 3.** BiFC confirms the interaction of OsCNIH1 with OsHKT1;3 and demonstrates the likely oligomerization of OsCNIH1 in transiently transfected tobacco leaves. (A, E) Reciprocal interaction between YFC–OsCNIH1/YFN–OsHKT1;3 and YFN–OsCNIH1/YFC–OsHKT1;3 confirms the interaction of the two proteins in the ER. (B) Co-expression of YFC–OsCNIH1 and YFN–OsCNIH1 indicates the possible oligomerization of cornichon in the ER. Absence of a fluorescence complementation signal indicates that: OsCNIH1 does not interact with AtPIP2A (C, H); OsHKT1;3 does not form oligomers (D); and the transporter and the aquaporin do not interact (F, G). (I) Oligomerization of AtPIP2A. Scale bar=25  $\mu$ m.

of *YFN-OsCNIH1* and *YFC-AtPIP2A* did not lead to reconstitution of EYFP fluorescence (Fig. 3C, H). Additional analyses demonstrated fluorescence reconstitution by expressing the C- and N-termini of YFP fused independently to the N-terminus of *OsCNIH1*, indicating the oligomerization of the protein in intracellular structures that resembled the Golgi apparatus (Fig. 3B). In contrast, similar studies with *OsHKT1;3* failed in reconstituting YFP fluorescence, suggesting that this transporter does not oligomerize (Fig. 3D). No interactions were observed between the aquaporin *AtPIP2A* and *OsHKT1;3* or *OsCNIH1* (Fig. 3C, F–H). These results demonstrated that the interaction between *OsHKT1;3* and *OsCNIH1* occurs at the ER, and indicated the possible oligomerization of rice cornichon. Moreover, the results suggested that BiFC did not seem to be a result of overexpression of the proteins in the same membrane, as indicated by failure in reconstituting EYFP associated with *OsHKT1;3*.

#### *Cornichon co-localizes with OsHKT1;3 and resides in the ER and Golgi*

Further support for the interaction between *OsHKT1;3* and *OsCNIH1* was obtained by analysing tobacco leaf epidermis

co-transformed with *OsCNIH1-mCherry* and *OsHKT1;3-EYFP*. Expression of *OsCNIH1-mCherry* was generally observed as a reticulated structure (Fig. 4A, left), while that of *OsHKT1;3-EYFP* mainly appeared as bright puncta (Fig. 4A, centre). Overlapping both images showed that the puncta associated with *OsHKT1;3-EYFP* superimposed the reticula highlighted by *OsCNIH1-mCherry* (Fig. 4A, right, white dots). By plotting the pixel number for *OsHKT1;3-EYFP* against that from *OsCNIH1-mCherry*, pixel distribution was demonstrated to occur along a straight line (Fig. 4D, left), and, by applying Costes' method (Costes *et al.*, 2004) for image analysis using ImageJ (JACoP Plug-in), a Pearson's coefficient (PC) and *P*-value of 0.68 and 100%, respectively, were calculated (Fig. 4D, left) (Bolte and Cordelières, 2006). These findings confirmed that *OsCNIH1* and *OsHKT1;3* partially co-localized in the ER. In view of these results, it was important to determine and confirm the site(s) of residence for *OsCNIH1* and *OsHKT1;3* individually, and for this co-expression studies were carried out employing several well-characterized membrane markers fused to fluorescent proteins. *OsCNIH1-mCherry* highlighted a reticulated structure, strongly suggesting its expression at the ER (Fig. 4B, left); this was confirmed by the comparable expression observed for the

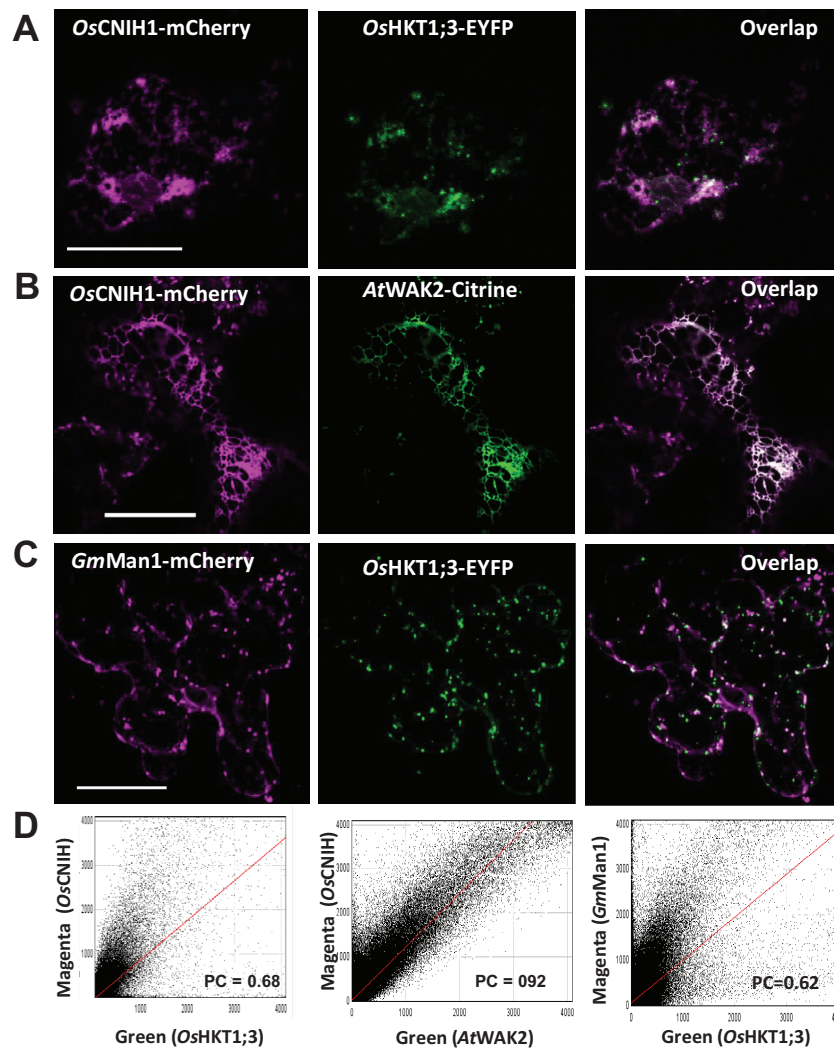

**Fig. 4.** Intracellular co-localization of OsCNIH1 with OsHKT1;3 in plants. (A) Expression of OsCNIH1–mCherry (left) and OsHKT1;3–EYFP (centre), and co-localization of the two proteins (right) in tobacco leaves. (B) Expression of OsCNIH1–mCherry (left) and the ER marker *AtWAK2*–Citrine (centre), and co-localization of the two proteins (right). (C) Expression of OsHKT1;3–EYFP (centre) and the Golgi marker *GmMan1*–mCherry (left), and co-localization of the two proteins (right). (D) Scatter plots of pixel distribution of the magenta (y-axis) and green (x-axis) channels employing the Costes algorithm for images shown in (A, left), (B, centre), and (C, right). Scale bar=25  $\mu$ m.

ER marker *AtWAK2*–Citrine (Fig. 4B, centre) (Nelson *et al.*, 2007) and by the overlapping of signals from these two markers (Fig. 4B, right, white signal). Image analysis demonstrated a high degree of co-localization between *OsCNIH1* and *AtWAK2* (PC=0.82;  $P=100\%$ ; Fig. 4D, centre). Localization of *OsHKT1;3*–EYFP emphasized small, highly motile punctate structures in the cytoplasm, indicating localization to potentially vesicular structures (Fig. 4C, centre). To identify this compartment, *OsHKT1;3*–EYFP was co-expressed with the Golgi marker *GmMan1*–mCherry (Nelson *et al.*, 2007), and similar punctate cytoplasmic signals were observed for both proteins (Fig. 4C, left and centre), that when overlapped showed partial co-localization (Fig. 4C, right, white areas). Applying Costes' method, a calculated PC of 0.62 with a  $P$ -value of 100% was obtained, confirming the co-localization of the two proteins (Fig. 4D, right) which indicated that *OsHKT1;3*–EYFP partially localized to the Golgi.

Work in yeast and mammals has demonstrated that cornichon homologues did not locate exclusively to one specific

compartment, but rather circulated actively between the Golgi and the ER, in association with COPII vesicles (Powers and Barlowe, 1998; Harmel *et al.*, 2012). To identify more clearly the plant cornichon location, *GmMan1*–Citrine was used as a Golgi marker and *AtSec24*–YFP as a marker for ER exit sites (ERES)/COPII (Hanton *et al.*, 2009; Langhans *et al.*, 2012). Co-expression of *OsCNIH1*–mCherry (Fig. 5A, left) with *GmMan1*–Citrine (Fig. 5A, centre) showed that both proteins highlighted punctate structures with properties similar to that of the Golgi, with *OsCNIH1*–mCherry also highlighting the network associated with the ER, particularly surrounding the nucleus (Fig. 5A, left). Quantitative analyses of the overlapped images (Fig. 5A, right) showed a relatively low correlation (PC=0.40,  $P=100\%$ ; Supplementary Fig. S2A at JXB online), indicating that *OsCNIH1* was also present in the Golgi apparatus. When *OsCNIH1* was co-expressed with *AtSec24*–YFP, *OsCNIH1* labelled the ER (Fig. 5B, left), while *AtSec24* appeared as bright puncta dispersed throughout the cytoplasm (Fig. 5B, centre). *AtSec24*–YFP

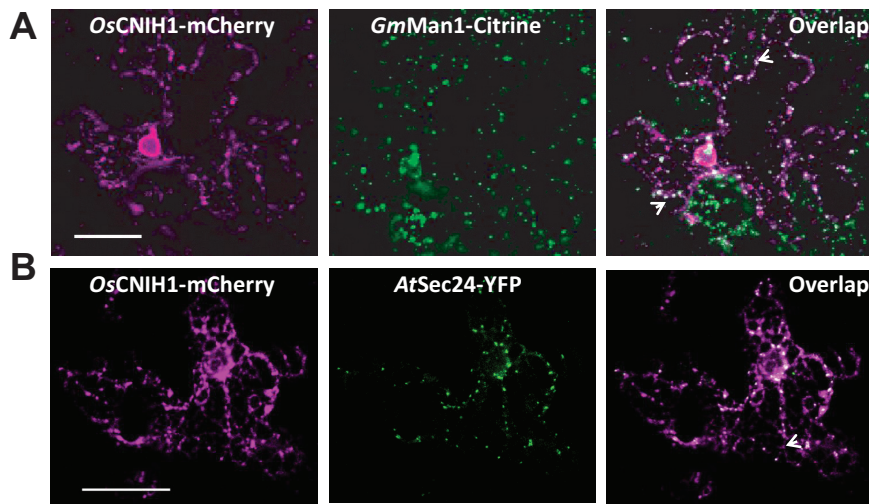

**Fig. 5.** *OsCNIH1* is also located at the Golgi and ERES. (A) Expression of *OsCNIH1*-mCherry (left) and the Golgi marker *GmMan1*-Citrine (centre), and the co-localization of the two proteins (right). (B) Expression of *OsCNIH1*-mCherry (left) and the ERES/COPII marker *AtSec24*-YFP (centre), and overlapping of the two images showing the co-localization of the two proteins (right). Arrows indicate the punctate sites of co-localization (white signal). Scale bar=25  $\mu\text{m}$ .

co-localized with the reticulate *OsCNIH1*-mCherry fluorescence (Fig. 5B, right) as indicated by the calculated  $\text{PC}=0.66$  and  $P=100\%$  (Supplementary Fig. S2B), corresponding to the proposed structure for the ERES/COPII compartment. Together, these imaging data indicated that rice cornichon located to the Golgi and ER.

#### Subcellular localization of *OsHKT1;3*

The intracellular localization of *OsHKT1;3* (Fig. 4A, C) differed from that of plasma membrane-localized HKT isoforms (Horie *et al.*, 2007, 2011; Lan *et al.*, 2010; Xue *et al.*, 2011). To explore the localization of *OsHKT1;3* in more detail, co-localization analysis was performed with the same membrane markers used for *OsCNIH1* (Figs 4, 5). Co-expression of *OsHKT1;3*-mCherry with *AtSec24*-YFP demonstrated that both proteins were visualized as punctate structures that did not locate to the same compartment (Fig. 6A). Confirmation that co-localization of *OsHKT1;3*-mCherry and *AtSec24*-YFP was low (Fig. 6A, right) was supported by the low PC of 0.32 ( $P=100\%$ ; Supplementary Fig. S2C at JXB online). Co-expression of *OsHKT1;3* and *AtPIP2A*-mCherry in tobacco leaf epidermal cells verified that the puncta corresponding to *OsHKT1;3*-EYFP localized to the cytoplasm (Fig. 6B, left), while expression of *AtPIP2A*-mCherry was limited to the plasma membrane (Fig. 6B, centre). Merging of the two channels yielded few co-localization points (Fig. 6B, right); quantitative analysis revealed no co-localization between *OsHKT1;3* and *AtPIP2A*, as indicated by the low PC of 0.14 ( $P=100\%$ ; Supplementary Fig. S2D). Additional evidence supporting the Golgi as the site of residence for *OsHKT1;3* was obtained with use of the fungal toxin brefeldin A (BFA). BFA blocks the activation of the GTPase Arf1 by causing a non-productive complex with its Sec7 GTP exchange factor (Chardin and McCormick, 1999), resulting in the formation of Golgi aggregates described as BFA bodies

(Ritzenthaler *et al.*, 2002). Incubation of tobacco leaf epidermis transformed with *OsHKT1;3*-EYFP for 15 min with 25  $\mu\text{M}$  BFA caused the appearance of relatively large fluorescent aggregates (Fig. 6C, right) that resembled BFA bodies, in comparison with the smaller puncta from *OsHKT1;3*-EYFP in the untreated epidermis (Fig. 6C, left). Measurement of the rapid movement of the fluorescent puncta associated with *OsHKT1;3*-EYFP gave a mean velocity of  $0.14 \pm 0.02 \mu\text{m s}^{-1}$  (mean  $\pm$ SD,  $n=9$ ; Supplementary Fig. S3, Supplementary Video S1), similar to the rates that have been reported for the highly motile Golgi apparatus (Boevink *et al.*, 1998). Although some puncta did not move, corresponding to stationary Golgi stacks (Lerich *et al.*, 2012), others moved at a lower speed that varied between  $0.081 \mu\text{m s}^{-1}$  and  $0.061 \mu\text{m s}^{-1}$ . All these observations provided further evidence that *OsHKT1;3*-EYFP locates to the Golgi apparatus of plant cells.

#### Co-expression of *OsCNIH1* and *OsHKT1;3* in *Xenopus* oocytes modified the cellular localization of the transporter and inhibited its activity

In view of the results that indicated the interaction and co-localization of *OsCNIH1* and *OsHKT1;3* in plant cells, the oocyte expression system was employed to study the potential effects of *OsCNIH1* on the transport activity of *OsHKT1;3*. Initially, the properties of the transporter reported as an  $\text{Na}^+$ -selective transport mechanism were confirmed (Jabnounge *et al.*, 2009). Oocytes injected with *OsHKT1;3* cRNA showed the activation of inward currents when exposed to  $\text{Na}^+$  solutions (Fig. 7A, right), but not when the cation was absent (Fig. 7A, centre). A control water-injected oocyte exposed to sodium failed to activate any measurable currents (Fig. 7A, left). Confirmation that the inward currents corresponded to  $\text{Na}^+$  movement was derived from the increasing current magnitude recorded with increasing concentrations of  $\text{Na}^+$ , together with clear shifts in the reversal potential ( $E_r$ ) (Fig. 7B, arrows) activated by voltage



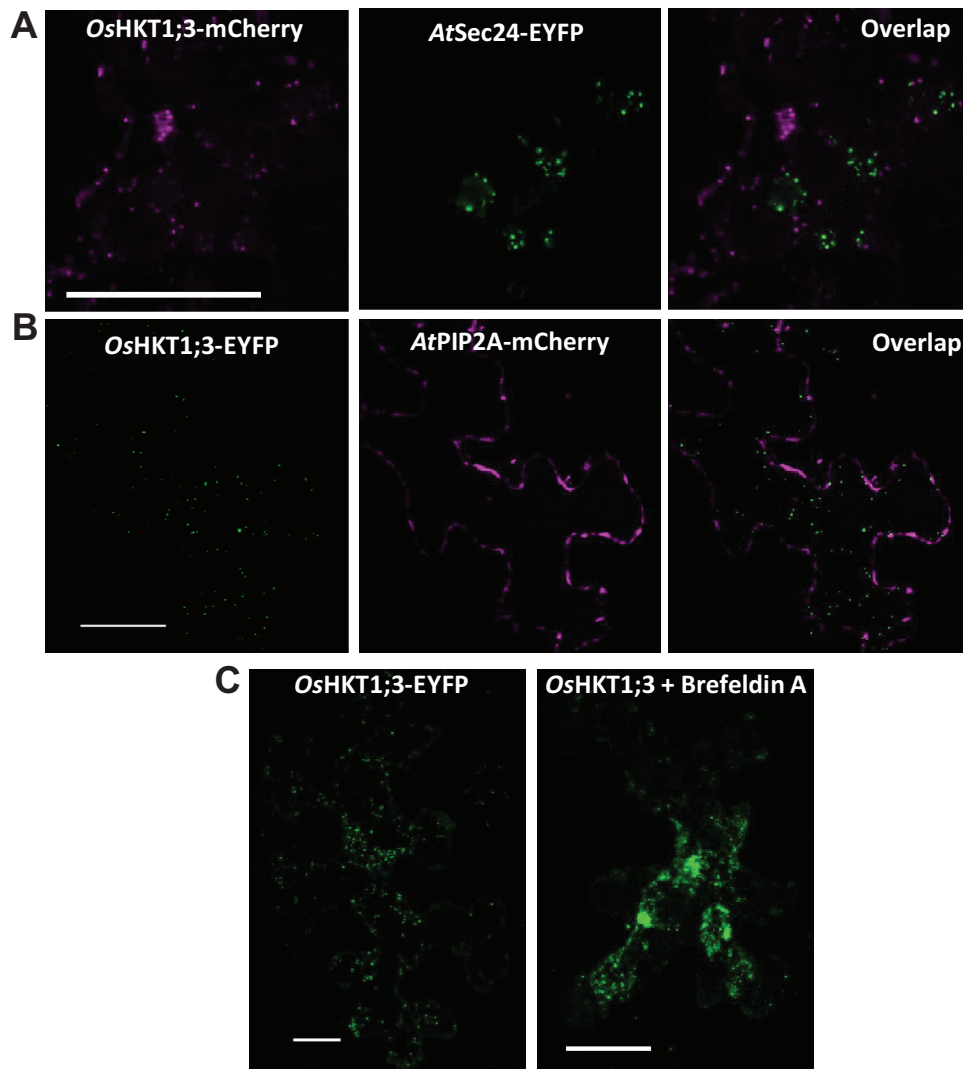

**Fig. 6.** OsHKT1;3 does not localize to the ERES or the plasma membrane and forms aggregates upon exposure to brefeldin A. (A) Expression of OsHKT1;3-mCherry (left) and the ERES/COPII marker AtSec24-EYFP (centre), and overlapping of the two images (right). (B) Co-localization analysis of OsHKT1;3-EYFP (left) with the plasma membrane marker AtPIP2A-mCherry (centre), and overlapping of the two images (right). The intracellular localization of OsHKT1;3-EYFP, seen as fluorescent puncta distributed throughout the cell (C, left), was modified after incubation of the epidermis with brefeldin A at 25  $\mu\text{M}$  for 15 min, resulting in the formation of aggregated bodies (C, right). Scale bar=25  $\mu\text{m}$ .

ramps. Similar experiments with a water-injected oocyte did not show changes in current magnitude or in  $E_r$  with variable  $\text{Na}^+$  concentrations (Fig. 7C). Plotting the  $E_r$  values against external  $\text{Na}^+$  concentrations gave a linear relationship with a slope of 54.2 mV per decade  $\text{Na}^+$  (Fig. 7D, circles). A similar relationship was observed for  $E_r$  values obtained in the presence of 1 mM  $\text{K}^+$  (Fig. 7D, squares). These results clearly indicated that OsHKT1;3 functions as an  $\text{Na}^+$ -selective transporter/channel and that OsHKT1;3 does not function as an  $\text{Na}^+/\text{K}^+$  symporter, as has been reported for some members of the sub-family 2 of HKT transporters (Rubio *et al.*, 1995; Gassmann *et al.*, 1996; Horie *et al.*, 2001). Kinetic properties of the transporter were obtained by plotting current magnitude from voltage ramps against external  $\text{Na}^+$  concentrations at different holding potentials, observing saturation at concentrations  $>50\text{mM}$  (Fig. 7E). Data analysis with the Michaelis–Menten equation showed that the apparent transport affinity constant ( $K_m$ ) for  $\text{Na}^+$  increased at less negative holding potentials, with

values of 6.4, 9.6, 17.1, and 42.6 mM obtained at  $-180$ ,  $-160$ ,  $-140$ , and  $-120$  mV, respectively (Fig. 7E). Assuming a single binding site for sodium, Equation 1 was employed to evaluate the voltage dependence of  $K_m$ , where  $\delta$  is the fractional electrical distance,  $e$  is the elementary charge,  $V$  is the membrane potential,  $k$  is Boltzmann's constant, and  $T$  is the absolute temperature (Woodhull, 1973).

$$K_m(\delta) = K_m^{(0\text{mV})} * \exp\left(\delta * e * \frac{V}{k * T}\right) \quad (1)$$

From this analysis, the putative  $\text{Na}^+$  binding site was calculated to be located at ( $\delta$ ) 65% within the membrane electrical field (Fig. 7F, fitted line). Having confirmed the basic properties of OsHKT1;3 (Jabnourne *et al.*, 2009), the effects of co-expressing OsHKT1;3 together with OsCNIH1 in the oocyte system were then analysed. Voltage-clamp recordings showed that the activity of the transporter was inhibited

by the presence of *OsCNIH1*, as indicated by the absence of inward currents at all extracellular  $\text{Na}^+$  concentrations tested (Fig. 8A, right). In comparison, an oocyte injected with only the cRNA for *OsHKTI;3*, activated large inward currents in response to voltage ramps, similar to those previously observed (Fig. 8A, left; see also Fig. 7D). The inhibition of *OsHKTI;3* by co-injection of *OsCNIH1* in the oocytes could be the result either of direct inhibition of the transporter activity or of the interaction between the two proteins preventing the default targeting of *OsHKTI;3* to the oocyte membrane. To distinguish between these two possibilities, *EGFP* was fused to the C-terminus of *OsHKTI;3* and then the construct was expressed in albino *Xenopus* oocytes, individually or together with *OsCNIH1*, and the expression was observed under epifluorescence microscopy. When expressed alone, *OsHKTI;3*-EGFP was observed as punctate structures at the membrane of the oocyte (Fig. 8B, left). In contrast, when co-injected with *OsCNIH1*, *OsHKTI;3*-EGFP

fluorescence was observed in the interior of the oocyte as a reticulated structure, resembling the ER (Fig. 8B, centre). Autofluorescence from a control water-injected oocyte was minimal (Fig. 8B, right).

*Deletion of ERV14 in yeast modifies the intracellular location of OsHKTI;3 which is restored upon expression of OsCNIH1 or ERV14*

To gain further insight into the interaction between *OsCNIH1* and *OsHKTI;3*, the effect of mutating *ERV14*, the yeast cornichon homologue, on the heterologous expression of *OsHKTI;3* tagged with GFP (*pGRU1-OsHKTI;3*) in BY4741 yeast cells was tested. Transformation of BY4741 yeast cells with the *pGRU1-OsHKTI;3* vector showed that localization of *OsHKTI;3* was intracellular, highlighting several round bodies that indicated the presence of the transporter at the Golgi apparatus (Fig. 9A; BY4741)

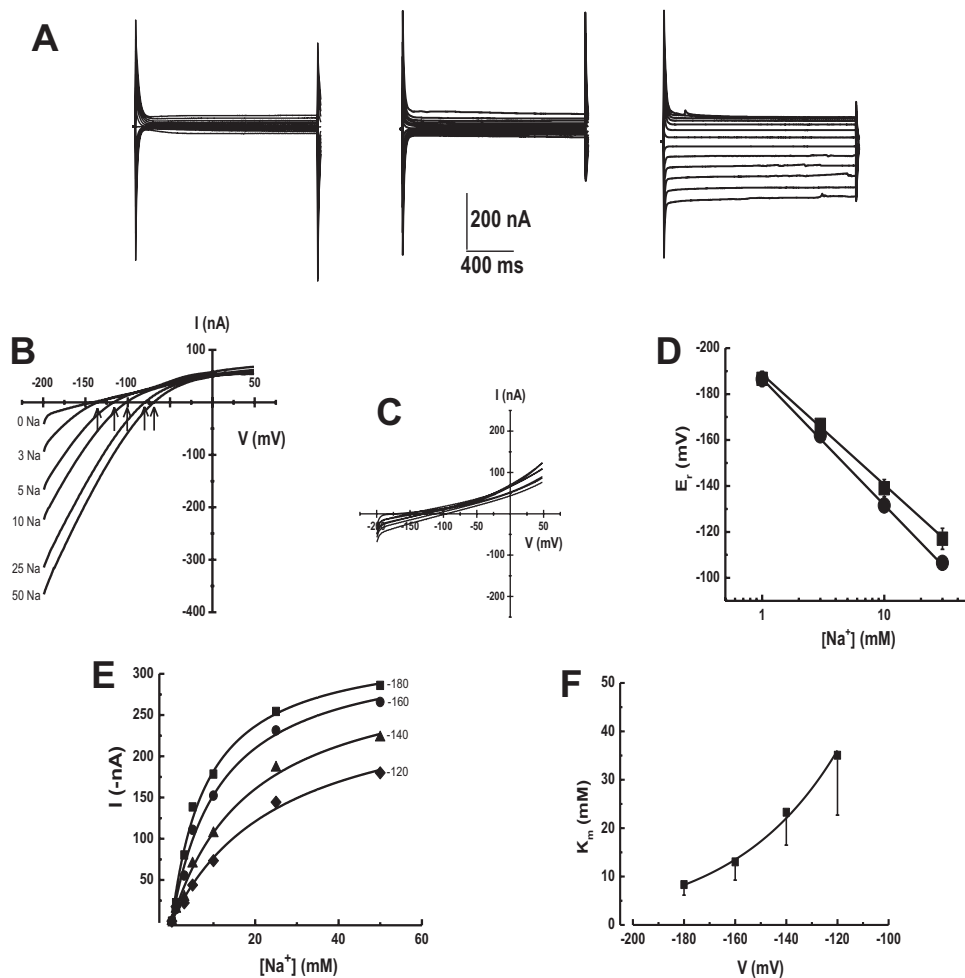

**Fig. 7.** Transport properties of *OsHKTI;3*. (A) Original traces of currents activated by voltage pulses between  $-200$  mV and  $50$  mV in  $20$  mV steps from a control water-injected oocyte exposed to  $30$  mM NaCl (left), or expressing *OsHKTI;3* exposed to the bath solution either without (centre) or with  $30$  mM NaCl (right). (B) I-V plot from currents recorded in an oocyte expressing *OsHKTI;3* and exposed to different concentrations of NaCl (mM);  $E_r$  (arrows). (C) I-V plot from currents recorded from a control oocyte and exposed to the same NaCl solutions as in (B). (D) Plot showing the linear relationship between  $E_r$  and extracellular  $\text{Na}^+$  concentrations from oocytes expressing *OsHKTI;3* in the absence (circles) or presence of  $1$  mM KCl (squares). Lines are least square linear regressions fits with a slope of  $54.2$  mV per decade. (E) Sodium transport kinetics were voltage dependent. Lines are fits to the Michaelis-Menten equation at the corresponding voltages with  $r^2 \geq 0.9$ . (F) The affinity ( $K_m$ ) of *OsHKTI;3* for  $\text{Na}^+$  was voltage dependent. The line is a fit to Equation 1. Data are from more than five oocytes from 3–4 different frogs and correspond to the mean  $\pm$ SD.

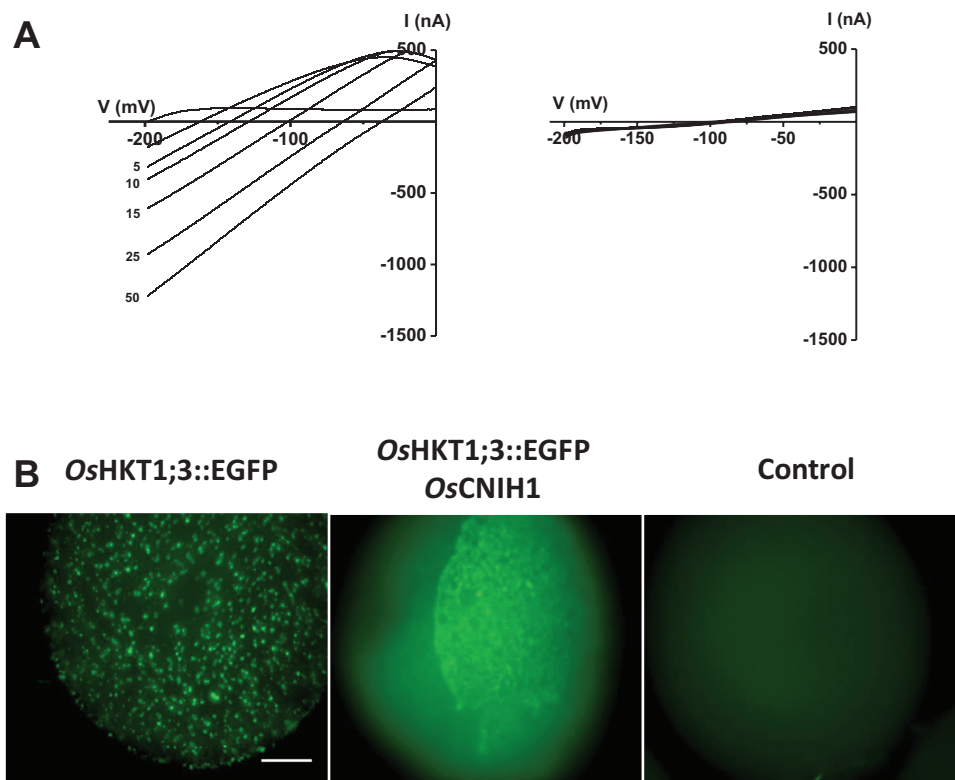

**Fig. 8.** Co-expression of OsHKT1;3 and OsCNIH1 in *Xenopus* oocytes caused retention of the transporter in the ER, preventing the activation of Na<sup>+</sup> currents. (A) Sodium inward currents activated by voltage ramps from an oocyte expressing OsHKT1;3 (left). Co-expression of OsHKT1;3 and OsCNIH1 (cRNA ratio injected 1:1) in a *Xenopus* oocyte (right). (B) Expression of OsHKT1;3–EGFP was observed as puncta at the plasma membrane of a *Xenopus* oocyte (left); upon co-expression with OsCNIH1, fluorescence was observed exclusively in a reticulated structure (centre). Autofluorescence is from a water-injected oocyte (right). Scale bar=250  $\mu$ m. (This figure is available in colour at *JXB* online.)

(Losev *et al.*, 2006; Matsuura-Tokita *et al.*, 2006). A different localization for OsHKT1;3–GFP was observed in the BY4741 $\Delta$ erv14 mutant cells, as indicated by the diffused fluorescence observed around the nucleus and throughout most of the cytoplasm, a distribution that has been associated with the ER (Fig. 9A; BY4741 $\Delta$ erv14) (Manford *et al.*, 2012). Confirmation that localization of OsHKT1;3 at the Golgi apparatus depended on the presence of OsCNIH1 was obtained by co-transforming BY4741 $\Delta$ erv14 cells with OsCNIH1 and OsHKT1;3–GFP and observing the localization of the latter as round structures corresponding to the Golgi apparatus (Fig. 9A; BY4741 $\Delta$ erv14+OsCNIH1). Similar results were observed when rice cornichon was replaced with ERV14 in the co-transformation of the BY4741 $\Delta$ erv14 cells (Fig. 9A; BY4741 $\Delta$ erv14+ERV14), indicating that both rice cornichon and yeast Erv14p can direct the transporter to the Golgi apparatus. Additional evidence was gathered by investigating the effects of expressing OsHKT1;3 in BY4741 and BY4741 $\Delta$ erv14 yeast cells upon salt stress. Figure 9B (top) shows that transformation of BY4741 cells with OsHKT1;3 and the empty *pDR-F1* vector (lower row) reduced cell growth between 0.8 M and 1.5 M NaCl, when compared with the parental cells transformed with the two empty vectors *pGRU1* and *pDR-F1* (Fig. 9B, upper row). Co-transformation of BY4741 $\Delta$ erv14 cells with OsHKT1;3 and the empty vector *pDR-F1*, in contrast, did not affect cell growth in the presence of NaCl (Fig. 9B, bottom, third row).

Co-transformation of the BY4741 $\Delta$ erv14 mutant cells with OsCNIH1 and OsHKT1;3 partially restored the sensitivity of the cells towards NaCl (Fig. 9B, bottom, second row), a similar response to that caused by the co-transformation of the BY4741 $\Delta$ erv14 cells with OsHKT1;3 and ERV14 (Fig. 9B, bottom, fourth row).

## Discussion

*The putative cargo receptor OsCNIH1 interacts with the Na<sup>+</sup> transporter OsHKT1;3*

Protein–protein interactions play an essential role in cell structure and function, and have been shown to be important for protein function, regulation, and targeting (Lee *et al.*, 2009; Geiger *et al.*, 2010). The mbSUS with the *Arabidopsis* interactome (Lalonde *et al.*, 2010; Chen *et al.*, 2012; Jones *et al.*, 2014) was employed to identify proteins that might modulate the activity of OsHKT1;3 by direct protein–protein interactions. A total of 19 potential membrane protein interactions from *Arabidopsis* were identified (Table 1), and, from these, a protein which shows homology to *Drosophila* and human cornichon (CNIH) (Bökel *et al.*, 2006; Schwenk *et al.*, 2009) and yeast Erv14p (Powers and Barlowe, 1998, 2002) was selected for further analysis. In all these biological systems, the cornichon homologues have been described as cargo receptors for membrane proteins that may (Bökel *et al.*,

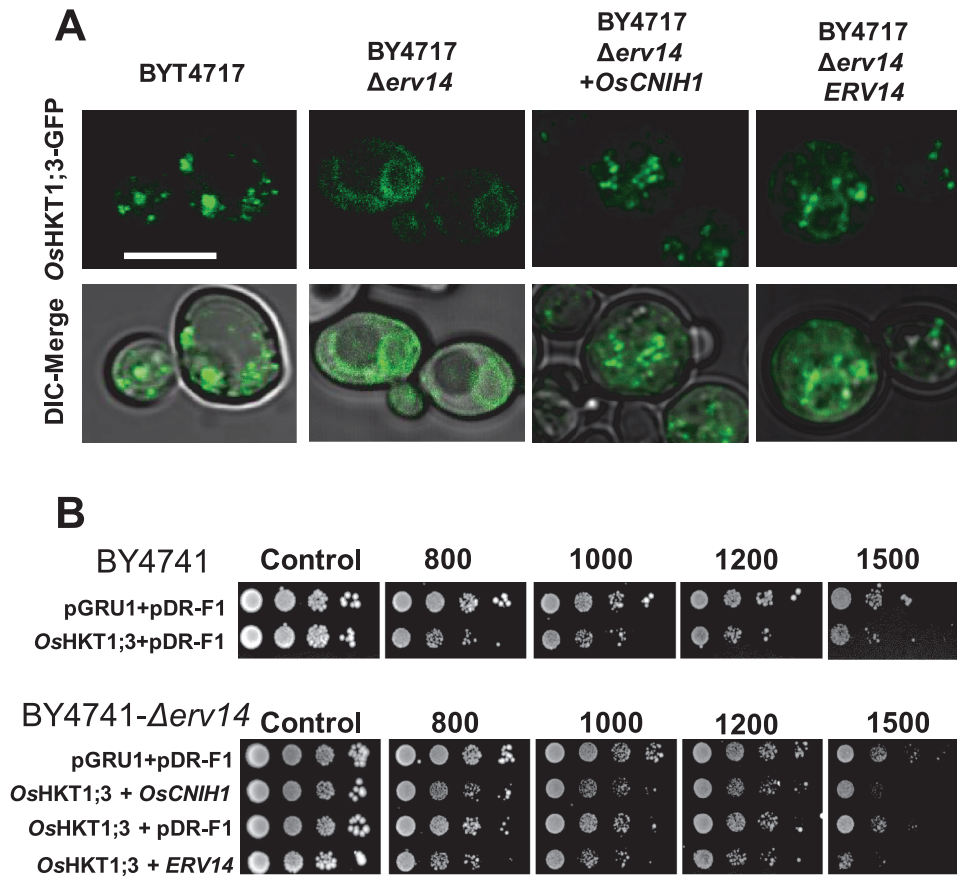

**Fig. 9.** *OsCNIH1* restores the intracellular expression of *OsHKT1;3* in the yeast mutant *BY4741 $\Delta$ erv14* and sensitivity to NaCl. (A) Fluorescence and DIC images of living *BY4741* and *BY4741 $\Delta$ erv14* cells expressing *OsHKT1;3*-GFP observed by confocal fluorescence microscopy and co-expressing either *OsCNIH1* or *ERV14p*. Scale bar=5  $\mu$ m. (B) Drop-test assay on yeast strains *BY4741* (top) and *BY4741 $\Delta$ erv14* (bottom) grown in YNB solid medium with different Na<sup>+</sup> concentrations and transformed with *pGRU1* and *pDR-F1*, *OsHKT1;3* and *pDR-F1*, *OsHKT1;3* and *OsCNIH1*, or *OsHKT1;3* and *ERV14*. Representative results of at least three different experiments are shown.

2006; Schwenk *et al.*, 2009) or may not (Powers and Barlowe, 1998, 2002; Herzig *et al.*, 2012) remain attached to the cargo. However, as far as could be assessed from the literature, there is no knowledge of the cornichon homologues in plants.

The interaction between the rice homologue *OsCNIH1* and the Golgi membrane Na<sup>+</sup> transport protein *OsHKT1;3* was identified. Evidence for the interaction between *OsHKT1;3* and *OsCNIH1* was derived from growth of diploid yeast cells on selective media (IS0 and IS500) and activation of the reporter LacZ (Fig. 1). This interaction was confirmed *in planta* by bimolecular complementation of EYFP in tobacco cells where intracellular fluorescence signals were observed from reticulated structures reminiscent of the ER (Fig. 3A, E). This result was observed with either the C- or N-terminus of EYFP fused to the N-terminus of either *OsCNIH1* or *OsHKT1;3* (Fig. 3A, E). These observations were corroborated by co-localization studies between *OsCNIH1* and *OsHKT1;3* which also demonstrated the intracellular occurrence of both proteins in co-transformed tobacco leaves, where *OsHKT1;3* was observed as small puncta superimposed on the ER highlighted by *OsCNIH1* (Fig. 4A). Together, these results may be used to propose that direct interaction between *OsCNIH1* and *OsHKT1;3* occurs at the ER (Fig. 3A, E) and is

required to direct the Na<sup>+</sup> transporter to the Golgi (Fig. 4C). The absence of fluorescence complementation when tobacco leaves expressed the YFN-*OsCNIH1* and YFN-*AtPIP2A* protein chimeras indicated that the aquaporin does not interact with rice cornichon (Fig. 3C), and suggests that the interaction observed between *OsCNIH1* and *OsHKT1;3* was specific and not a general occurrence between cornichon and membrane proteins. Moreover, lack of EYFP fluorescence complementation by co-expression of YFN-*OsHKT1;3* and YFC-*OsHKT1;3* (Fig. 4D) indicates that overexpression of the protein at the same membrane does not, by itself, lead to reconstitution of the fluorescent protein, discarding the possibility that the results obtained with the interaction between *OsCNIH1* and *OsHKT1;3* are an artefact. This result was also supported by the absence of interaction observed with the mbsUS that indicated that *OsHKT1;3* does not oligomerize (Supplementary Fig. S4 at *JXB* online). Corroboration of the interaction of *OsCNIH1* with *OsHKT1;3* was obtained independently by employing *Xenopus* oocytes co-expressing the two proteins, resulting in the retention of the transporter in internal structures (Fig. 8B, centre), and the inability to measure *OsHKT1;3*-dependent Na<sup>+</sup> currents (Fig. 8A, right). In the absence of *OsCNIH1*, the transporter followed the

default pathway for exogenous proteins to the oocyte plasma membrane, similarly to what was observed for other heterologous expressed organelle-localized proteins, including aquaporins from plants. This response resembles the unregulated transport of the glutamate receptor (AMPA) to the plasma membrane observed in the *Caenorhabditis elegans* *cnih1* mutant (Brockie *et al.*, 2013), and may be a result of an imbalance in the assembly of the COPII system caused by the lack of cornichon which leads to the uncontrolled targeting of OsHKT1;3 to the oocyte plasma membrane. Only when the cargo receptor is present is the transporter retained in the endomembrane system (Fig. 8B, centre). Alterations in COPII-mediated ER membrane protein export have also been observed upon overexpression of Sec12p and were proposed to be a result of Sar1p titration (D'Enfert *et al.*, 1989; DaSilva *et al.*, 2004). Yet another result that further supported the interaction between OsCNIH1 and OsHKT1;3 as being responsible for the proper targeting of the transporter to the Golgi membrane was the restoration of the location of OsHKT1;3 in the yeast mutant BY4741 $\Delta$ erv14 upon co-expression with either of the cornichon homologues, OsCNIH1 or Erv14p (Fig. 9A). Parallel to these results, restoration of salt sensitivity to the BY4741 $\Delta$ erv14 yeast mutant by co-expression of the rice sodium transporter together with either of the two cornichon homologues (Fig. 9B) further supported the dependence of OsHKT1;3 on OsCNIH1 for the correct targeting of the transporter to its membrane of residence, the Golgi. These results strongly indicated that in the absence of Erv14p, OsHKT1;3 was not delivered to the Golgi membrane and, thus, did not disturb the functioning of the cell, allowing yeast growth in the presence of Na<sup>+</sup>.

The presence of OsCNIH1 in the ER and the Golgi apparatus (Figs 4, 5) is comparable with that reported for the homologues in yeast (Powers and Barlowe, 1998) and mammals (Harmel *et al.*, 2012). CNIH's homologues are associated with the transport of membrane proteins, including Axl2p in yeast (Powers and Barlowe, 1998, 2002; Gillingham *et al.*, 2004), Gurken in *Drosophila* (Bökel *et al.*, 2006), and GluRA<sub>o</sub> in mammals (Schwenk *et al.*, 2009; Kato *et al.*, 2010; Harmel *et al.*, 2012; Herring *et al.*, 2013), and, it is argued, OsHKT1;3 in rice. OsCNIH1 conserves three out of five amino acids (I96, F97, and L100; Fig. 2B, arrows) in the cytoplasmic loop between TMD2 and TMD3 that effect the binding of Erv14p to COPII vesicles (Powers and Barlowe, 2002), suggesting that in plants, transport of membrane proteins in the early secretory pathway may also involve the association of OsCNIH1 with COPII vesicles. This is supported by the co-localization of OsCNIH1 with the *bona fide* COPII marker AtSec24 in tobacco leaves (Fig. 5B), a site where OsCNIH1 would be functioning as a cargo receptor for OsHKT1;3 (Fig. 4A). Targeting of OsHKT1;3 to the Golgi apparatus by OsCNIH1 can be compared with the Erv14p-dependent localization of Rud3p to the Golgi in yeast that also involves the participation of the GTP-binding protein Arf1p (Gillingham *et al.*, 2004). Recent results in yeast have revealed the central role played by Erv14p as a cargo receptor for a number of membrane proteins including the flippases Dnf1p and Dnf2p, the hexose transporters Hxt3p, Hxt4p,

and Hxt5p, as well as the Na<sup>+</sup>/H<sup>+</sup> exchanger Nha1p, among others (Herzig *et al.*, 2012). As indicated by the BiFC results (Fig. 3B), OsCNIH1 seems to form oligomers. This feature seems to be shared with cargo receptors such as ERGIC-53 and p24 protein families (Dancourt and Barlowe, 2010) and may be important for its functioning. In particular, Emp47p, a Type I membrane protein with homology to ERGIC-53, has been demonstrated to oligomerize as a requisite for its exit from the ER (Sato and Nakano, 2003). Further studies will help to confirm this result with OsCNIH1.

In view of the evidence that cornichons may act as cargo receptors in plants, the Arabidopsis Membrane-based Interactome Network Database (MIND1; Jones *et al.*, 2014) was analysed. It was found that the *Arabidopsis* cornichon AtCNIH1 (At3g12180) interacts with 535 proteins (Supplementary Table S3 at JXB online), with 30% of these corresponding to membrane transport proteins (Supplementary Fig. S5), strengthening the proposed role of CNIH as a membrane protein cargo receptor in plants.

### OsHKT1;3 localizes to the Golgi system

Co-localization of OsHKT1;3–EYFP with the Golgi membrane marker *GmMan1* (Fig. 4C), its apparent aggregation in BFA bodies caused by BFA (Fig. 6C; Ritzenthaler *et al.*, 2002), and the high motility of the punctate structures in which it is observed (Supplementary Fig. S3, Supplementary Video S1 at JXB online) are evidence consistent with localization of this transporter at the Golgi membrane. OsHKT1;3 does not localize to the plasma membrane (Fig. 6B) as no co-localization with the aquaporin AtPIP2A was observed, distinguishing this HKT from other members of the gene family (Horie *et al.*, 2007, 2011; Munns *et al.*, 2012). Similar protein fusions of GFP to AtAMT1;1 (a plasma membrane resident transporter) and to another rice HKT, OsHKT1;4, demonstrated that these two proteins localized to the plasma membrane (unpublished results), discarding the possibility that tagging of the protein might have modified its membrane of residence (Figs 4C, 6A, C, D). In plants, transporters belonging to large gene families, as is the case for HKT, have members localized to multiple cellular locations, which can include the Golgi. In particular, NHX5 and NHX6, two Na<sup>+</sup>/H<sup>+</sup> exchangers (Bassil *et al.*, 2011), as well as a phosphate transporter, PHT4;6 (Cubero *et al.*, 2009), have been localized to the Golgi, whereas other family members are either plasma membrane (i.e. NHX7, NHX8, and PHT1) or tonoplast localized (NHX1–NHX4). Moreover, members of the aquaporin family of proteins have diverse subcellular localizations, being present in several intracellular compartments (Wudick *et al.*, 2009). Therefore, it is likely that HKT transporters may be located in different cellular compartments.

### OsHKT1;3 is an Na<sup>+</sup> transporter

Functional characterization in two different heterologous expression systems; *Xenopus* oocytes and yeast, demonstrated that OsHKT1;3 is an Na<sup>+</sup> transporter (Figs 7–9). Electrophysiological data from the oocyte system showed

that the reversal potential changed according to Nernst with extracellular  $\text{Na}^+$  (54.2 mV per decade) (Fig. 7D), indicative of the high selectivity of *OsHKT1;3* for sodium, confirming results reported previously (Jabnoun *et al.*, 2009). Expression of *OsHKT1;3* in the yeast BY4741 rendered the colonies more susceptible to  $\text{Na}^+$  (Fig. 9B), probably by generating an ionic imbalance in the cell and further confirming the selectivity of the transporter for this cation.

Although no direct evidence is available, it is proposed that *OsHKT1;3* in the Golgi membrane could catalyse the downhill transport of  $\text{Na}^+$  towards the cytoplasm and, thus, may function as an alternative shunt conductance for the  $\text{H}^+$  pumps located in this organelle (Mitsuda *et al.*, 2001; Shimaoka *et al.*, 2004; Dettmer *et al.*, 2005; Strompen *et al.*, 2005). The Golgi-located NHX5 or NHX6  $\text{Na}^+$  exchangers (Yokoi *et al.*, 2002; Bassil *et al.*, 2011) would lead to  $\text{Na}^+$  accumulation within the Golgi, establishing the  $\text{Na}^+$  gradient required for the functioning of *OsHKT1;3*. Recently, an  $\text{Na}^+$ -selective mechanism has been demonstrated to play a similar role in the lysosomal membrane of mammalian cells (Wang *et al.*, 2012).

Together, the results demonstrate that the highly selective  $\text{Na}^+$  transporter/channel *OsHKT1;3* unexpectedly is located at the Golgi membrane, targeted to this endomembrane by its interaction with a newly described cargo receptor in plants, *OsCNIH1*. Finding *OsHKT1;3* at the Golgi raises the possibility of new functions for the HKT family in addition to those previously described. Future research would demonstrate the biological significance of *OsCNIH1* and *OsHKT1;3* in the rice plant.

## Supplementary data

Supplementary data are available at *JXB* online.

Figure S1. Deletion of *ERV14* in *S. cerevisiae*.

Figure S2. Quantification of co-localization between *OsCNIH1* and *OsHKT1;3* and other membrane markers.

Figure S3. Dynamics of *OsHKT1;3*-EYFP in tobacco epidermal cells.

Figure S4. Rice HKT transporters do not interact with each other, indicating the absence of oligomerization.

Figure S5. Classification of *AtCNIH*-interacting proteins.

Table S1. Primers used for gene cloning into the Gateway (TOPO), pYeP352, and pOO2 plasmids.

Table S2. Primers used for the deletion of *ERV14* in *S. cerevisiae*.

Table S3. *Arabidopsis thaliana* proteins interacting with *AtCNIH1*.

Video S1. Dynamics of *OsHKT1;3*-GFP-labelled bodies that resemble the movement associated with the Golgi apparatus.

## Acknowledgements

We thank Saman Parsa and Erika Valle for guidance with the mbSUS method; Pavla Herynková for her assistance with the yeast work; and Andrés Saralegui and Arturo Pimentel for their support with confocal microscopy. The HKT clones from rice were a kind gift from Dr Alonso

Rodríguez-Navarro. We also thank Dr Federica Brandizzi for the *AtSec24* COPII marker. Help from our technician Maria Guadalupe Munoz Garcia is also recognized. This work was supported by CONACyT grant 79191, DGAPA grant IN203112 to OP, and grant LD13037 to HS.

## References

- Bassil E, Ohto M, Esumi T, Tajima H, Zhu Z, Cagnac O, Belmonte M, Peleg Z, Yamaguchi T, Blumwald E. 2011. The Arabidopsis intracellular  $\text{Na}^+/\text{H}^+$  antiporters NHX5 and NHX6 are endosome associated and necessary for plant growth and development. *The Plant Cell* **23**, 224–239.
- Belda-Palazón B, Ruiz L, Martí E, Tárraga S, Tiburcio AF, Culiñez F, Farràs R, Carrasco P, Ferrando A. 2012. Aminopropyltransferases involved in polyamine biosynthesis localize preferentially in the nucleus of plant cells. *PLoS One* **7**, e46907.
- Belden WJ, Barlowe C. 2001. Role of Erv29p in collecting soluble secretory proteins into ER-derived transport vesicles. *Science* **294**, 1528–1531.
- Berthomieu P, Conéjéro G, Nublat A, *et al.* 2003. Functional analysis of *AtHKT1* in Arabidopsis shows that  $\text{Na}^+$  recirculation by the phloem is crucial for salt tolerance. *EMBO Journal* **22**, 2004–2014.
- Boevink P, Oparka K, Santa Cruz S, Martin B, Betteridge A, Hawes C. 1998. Stacks on tracks: the plant Golgi apparatus traffics on an actin/ER network. *The Plant Journal* **15**, 441–447.
- Bökel C, Dass S, Wilsch-Bräuninger M, Roth S. 2006. *Drosophila* Cornichon acts as cargo receptor for ER export of the TGF $\alpha$ -like growth factor Gurken. *Development* **133**, 459–470.
- Boite S, Cordelières FP. 2006. A guided tour into subcellular colocalization analysis in light microscopy. *Journal of Microscopy* **224**, 213–232.
- Brockie PJ, Jensen M, Mellem JE, *et al.* 2013. Cornichons control ER export of AMPA receptors to regulate synaptic excitability. *Neuron* **80**, 129–142.
- Bue CA, Barlowe C. 2009. Molecular dissection of Erv26p identifies separable cargo binding and coat protein sorting activities. *Journal of Biological Chemistry* **284**, 24049–2060.
- Bue C, Bentivoglio C, Barlowe C. 2006. Erv26p directs pro-alkaline phosphatase into endoplasmic reticulum-derived coat protein complex II transport vesicles. *Molecular Biology of the Cell* **17**, 4780–4789.
- Chardin P, McCormick F. 1999. Brefeldin A: the advantage of being uncompetitive. *Cell* **97**, 153–155.
- Chen J, Lalonde S, Obrdlik P, Noorani Vatani A, Parsa SA, Vilarino C, Revuelta JL, Frommer WB, Rhee SY. 2012. Uncovering Arabidopsis membrane protein interactome enriched in transporters using mating-based split ubiquitin assays and classification models. *Frontiers in Plant Science* **3**, 124.
- Conger R, Chen Y, Fornaciari S, Faso C, Held M a, Renna L, Brandizzi F. 2011. Evidence for the involvement of the Arabidopsis SEC24A in male transmission. *Journal of Experimental Botany* **62**, 4917–4926.
- Costes SV, Daelemans D, Cho EH, Dobbin Z, Pavlakis G, Lockett S. 2004. Automatic and quantitative measurement of protein–protein colocalization in live cells. *Biophysical Journal* **86**, 3993–4003.
- Cotsaftis O, Plett D, Shirley N, Tester M, Hrmova M. 2012. A two-staged model of  $\text{Na}^+$  exclusion in rice explained by 3D modeling of HKT transporters and alternative splicing. *PLoS One* **7**, e39865.
- Cubero B, Nakagawa Y, Jiang X-Y, Miura K-J, Li F, Raghothama KG, Bressan RA, Hasegawa PM, Pardo JM. 2009. The phosphate transporter PHT4;6 is a determinant of salt tolerance that is localized to the Golgi apparatus of Arabidopsis. *Molecular Plant* **2**, 535–552.
- D'Enfert C, Wuestehube LJ, Lila T, Schekman R. 1989. Sec12p-dependent membrane binding of the small GTP binding protein Sarlp promotes formation of transport vesicles from the ER. *Journal of Cell Biology* **114**, 663–670.
- Dancourt J, Barlowe C. 2010. Protein sorting receptors in the early secretory pathway. *Annual Review of Biochemistry* **79**, 777–802.
- DaSilva LL, Snapp E, Denecke J, Lippincott-Schwartz J, Hawes C, Brandizzi F. 2004. Endoplasmic reticulum export sites and Golgi bodies behave as single mobile secretory units in plant cells. *The Plant Cell* **16**, 1753–1771.

- Dettmer J, Schubert D, Calvo-Weimar O, Stierhof Y-D, Schmidt R, Schumacher K.** 2005. Essential role of the V-ATPase in male gametophyte development. *The Plant Journal* **41**, 117–124.
- Dunkel M, Latz A, Schumacher K, Müller T, Becker D, Hedrich R.** 2008. Targeting of vacuolar membrane localized members of the TPK channel family. *Molecular Plant* **1**, 938–949.
- Faso C, Chen Y-N, Tamura K, et al.** 2009. A missense mutation in the Arabidopsis COPII coat protein Sec24A induces the formation of clusters of the endoplasmic reticulum and Golgi apparatus. *The Plant Cell* **21**, 3655–3671.
- Garciadeblás B, Senn ME, Bañuelos MA, Rodríguez-Navarro A.** 2003. Sodium transport and HKT transporters: the rice model. *The Plant Journal* **34**, 788–801.
- Gassmann W, Rubio F, Schroeder J.** 1996. Alkali cation selectivity of the wheat root high-affinity potassium transporter HKT1. *The Plant Journal* **10**, 869–882.
- Geiger D, Scherzer S, Mumm P, et al.** 2010. Guard cell anion channel SLAC1 is regulated by CDPK protein kinases with distinct Ca<sup>2+</sup> affinities. *Proceedings of the National Academy of Sciences, USA* **107**, 8023–8028.
- Gillingham AK, Hin A, Tong Y, Boone C, Munro S.** 2004. The GTPase Arf1 and the ER to Golgi cargo receptor Erv14p cooperate to recruit the golgin Rud3p to the cis-Golgi. *Journal of Cell Biology* **167**, 281–292.
- Golldack D, Su H, Quigley F, Kamasani UR, Muñoz-Garay C, Balderas E, Popova O V, Bennett J, Bohnert HJ, Pantoja O.** 2002. Characterization of a HKT-type transporter in rice as a general alkali cation transporter. *The Plant Journal* **31**, 529–542.
- Grefen C, Lalonde S, Obrdlík P.** 2007. Split-ubiquitin system for identifying protein–protein interactions in membrane and full-length proteins. *Current Protocols in Neuroscience* **41**, 5.27:5.27.1–5.27.41.
- Hanton SL, Matheson L a, Chatre L, Brandizzi F.** 2009. Dynamic organization of COPII coat proteins at endoplasmic reticulum export sites in plant cells. *The Plant Journal* **57**, 963–974.
- Harmel N, Cokic B, Zolles G, Berkefeld H, Mauric V, Fakler B, Stein V, Klöcker N.** 2012. AMPA receptors commandeer an ancient cargo exporter for use as an auxiliary subunit for signaling. *PLoS One* **7**, e30681.
- Herring BE, Shi Y, Suh YH, Zheng C-Y, Blankenship SM, Roche KW, Nicoll RA.** 2013. Cornichon proteins determine the subunit composition of synaptic AMPA receptors. *Neuron* **77**, 1083–1096.
- Herzig Y, Sharpe HJ, Elbaz Y, Munro S, Schuldiner M.** 2012. A systematic approach to pair secretory cargo receptors with their cargo suggests a mechanism for cargo selection by Erv14. *PLoS Biology* **10**, e1001329.
- Horie T, Brodsky DE, Costa A, Kaneko T, Lo Schiavo F, Katsuhara M, Schroeder JI.** 2011. K<sup>+</sup> transport by the OsHKT2;4 transporter from rice with atypical Na<sup>+</sup> transport properties and competition in permeation of K<sup>+</sup> over Mg<sup>2+</sup> and Ca<sup>2+</sup> ions. *Plant Physiology* **156**, 1493–1507.
- Horie T, Costa A, Kim TH, Han MJ, Horie R, Leung H-Y, Miyao A, Hirochika H, An G, Schroeder JI.** 2007. Rice OsHKT2;1 transporter mediates large Na<sup>+</sup> influx component into K<sup>+</sup>-starved roots for growth. *EMBO Journal* **26**, 3003–3014.
- Horie T, Yoshida K, Nakayama H, Yamada K, Oiki S, Shinmyo A.** 2001. Two types of HKT transporters with different properties of Na<sup>+</sup> and K<sup>+</sup> transport in *Oryza sativa*. *The Plant Journal* **27**, 129–138.
- Jabnoun M, Espeout S, Mieulet D, et al.** 2009. Diversity in expression patterns and functional properties in the rice HKT transporter family. *Plant Physiology* **150**, 1955–1971.
- Jones AM, Xuan Y, Xu M, et al.** 2014. Border control—a membrane-linked interactome of Arabidopsis. *Science* **344**, 711–716.
- Kader A, Seidel T, Golldack D, Lindberg S.** 2006. Expressions of OsHKT1, OsHKT2, and OsVHA are differentially regulated under NaCl stress in salt-sensitive and salt-tolerant rice (*Oryza sativa* L.) cultivars. *Journal of Experimental Botany* **57**, 4257–4268.
- Kato AS, Gill MB, Ho MT, et al.** 2010. Hippocampal AMPA receptor gating controlled by both TARP and cornichon proteins. *Neuron* **68**, 1082–1096.
- Kinclová O, Ramos J, Potier S, Sychrová H.** 2001. Functional study of the *Saccharomyces cerevisiae* Nha1p C-terminus. *Molecular Microbiology* **40**, 656–68.
- Komarova NY, Meier S, Meier A, Grottemeyer MS, Rentsch D.** 2012. Determinants for Arabidopsis peptide transporter targeting to the tonoplast or plasma membrane. *Traffic* **13**, 1090–1105.
- Lalonde S, Sero A, Pratelli R, et al.** 2010. A membrane protein/signaling protein interaction network for Arabidopsis version AMPV2. *Frontiers in Physiology* **1**, 24.
- Lan W-Z, Wang W, Wang S-M, Li L-G, Buchanan BB, Lin H-X, Gao J-P, Luan S.** 2010. A rice high-affinity potassium transporter (HKT) conceals a calcium-permeable cation channel. *Proceedings of the National Academy of Sciences, USA* **107**, 7089–7094.
- Langhans M, Meckel T, Kress A, Lerich A, Robinson DG.** 2012. ERES (ER exit sites) and the ‘Secretory Unit Concept’. *Journal of Microscopy* **247**, 48–59.
- Lee SC, Lan W, Buchanan BB, Luan S.** 2009. A protein kinase–phosphatase pair interacts with an ion channel to regulate ABA signaling in plant guard cells. *Proceedings of the National Academy of Sciences, USA* **106**, 21419–21424.
- Lerich A, Hillmer S, Langhans M, Scheuring D, van Bentum P, Robinson DG.** 2012. ER import sites and their relationship to ER exit sites: a new model for bidirectional ER–Golgi transport in higher plants. *Frontiers in Plant Science* **3**, 143.
- Losev E, Reinke C a, Jellen J, Strongin DE, Bevis BJ, Glöck BS.** 2006. Golgi maturation visualized in living yeast. *Nature* **441**, 1002–1006.
- Ludewig U, von Wirén N, Frommer WB.** 2002. Uniport of NH<sub>4</sub><sup>+</sup> by the root hair plasma membrane ammonium transporter LeAMT1;1. *Journal of Biological Chemistry* **277**, 13548–13555.
- Mancias JD, Goldberg J.** 2008. Structural basis of cargo membrane protein discrimination by the human COPII coat machinery. *EMBO Journal* **27**, 2918–2928.
- Manford AG, Stefan CJ, Yuan HL, Macgurn JA, Emr SD.** 2012. ER-to-plasma membrane tethering proteins regulate cell signaling and ER morphology. *Developmental Cell* **23**, 1129–1140.
- Matsuura-Tokita K, Takeuchi M, Ichihara A, Mikuriya K, Nakano A.** 2006. Live imaging of yeast Golgi cisternal maturation. *Nature* **441**, 1007–1010.
- Mikosch M, Hurst AC, Hertel B, Homann U.** 2006. Diacidic motif is required for efficient transport of the K<sup>+</sup> channel KAT1 to the plasma membrane. *Plant Physiology* **142**, 923–930.
- Miller E, Antony B, Hamamoto S, Schekman R.** 2002. Cargo selection into COPII vesicles is driven by the Sec24p subunit. *EMBO Journal* **21**, 6105–6113.
- Miller EA, Beilharz TH, Malkus PN, Lee MCS, Hamamoto S, Orci L, Schekman R.** 2003. Multiple cargo binding sites on the COPII subunit Sec24p ensure capture of diverse membrane proteins into transport vesicles. *Cell* **114**, 497–509.
- Mitsuda N, Enami K, Nakata M, Takeyasu K, Sato MH.** 2001. Novel type Arabidopsis thaliana H(+)-PPase is localized to the Golgi apparatus. *FEBS Letters* **488**, 29–33.
- Møller IS, Gilliam M, Jha D, Mayo GM, Roy SJ, Coates JC, Haseloff J, Tester M.** 2009. Shoot Na<sup>+</sup> exclusion and increased salinity tolerance engineered by cell type-specific alteration of Na<sup>+</sup> transport in Arabidopsis. *The Plant Cell* **21**, 2163–2178.
- Mossessova E, Bickford LC, Goldberg J.** 2003. SNARE selectivity of the COPII coat. *Cell* **114**, 483–495.
- Munns R, James RA, Xu B, et al.** 2012. Wheat grain yield on saline soils is improved by an ancestral Na<sup>+</sup> transporter gene. *Nature Biotechnology* **30**, 360–364.
- Nelson BK, Cai X, Nebenführ A.** 2007. A multicolored set of *in vivo* organelle markers for co-localization studies in Arabidopsis and other plants. *The Plant Journal* **51**, 1126–1136.
- Obrdlík P, El-bakkoury M, Hamacher T, et al.** 2004. K<sup>+</sup> channel interactions detected by a genetic system optimized for systematic studies of membrane protein interactions. *Proceedings of the National Academy of Sciences, USA* **101**, 12242–12247.
- Ortiz-Ramirez C, Mora SI, Trejo J, Pantoja O.** 2011. PvAMT1;1, a highly selective ammonium transporter that functions as H<sup>+</sup>/NH<sub>4</sub><sup>+</sup> symporter. *Journal of Biological Chemistry* **286**, 31113–31122.
- Otte S, Barlowe C.** 2004. Sorting signals can direct receptor-mediated export of soluble proteins into COPII vesicles. *Nature Cell Biology* **6**, 1189–1194.
- Plett D, Safwat G, Gilliam M, Skrumsager Møller I, Roy S, Shirley N, Jacobs A, Johnson A, Tester M.** 2010. Improved salinity tolerance

of rice through cell type-specific expression of AtHKT1;1. *PLoS One* **5**, e12571.

**Powers J, Barlowe C.** 1998. Transport of Axl2p depends on Erv14p, an ER-vesicle protein related to the *Drosophila* cornichon gene product. *Journal of Cell Biology* **142**, 1209–1222.

**Powers J, Barlowe C.** 2002. Erv14p directs a transmembrane secretory protein into COPII-coated transport vesicles. *Molecular Biology of the Cell* **13**, 880–891.

**Ren Z-H, Gao J-P, Li L-G, Cai X-L, Huang W, Chao D-Y, Zhu M-Z, Wang Z-Y, Luan S, Lin H-X.** 2005. A rice quantitative trait locus for salt tolerance encodes a sodium transporter. *Nature Genetics* **37**, 1141–1146.

**Ritzenthaler C, Nebenführ A, Movafeghi A, Stussi-Garaud C, Behnia L, Pimpl P, Staehelin LA, Robinson DG.** 2002. Reevaluation of the effects of brefeldin A on plant cells using tobacco Bright Yellow 2 cells expressing Golgi-targeted green fluorescent protein and COPI antisera. *The Plant Cell* **14**, 237–261.

**Roth S, Neuman-Silberberg FS, Barcelo G, Schüpbach T.** 1995. Cornichon and the EGF receptor signaling process are necessary for both anterior–posterior and dorsal–ventral pattern formation in *Drosophila*. *Cell* **81**, 967–978.

**Rubio F, Gassmann W, Schroeder JI.** 1995. Sodium-driven potassium uptake by the plant potassium transporter HKT1 and mutations conferring salt tolerance. *Science* **270**, 1660–1663.

**Sanderfoot AA, Ahmed SU, Marty-Mazars D, Rapoport I, Kirchhausen T, Marty F, Raikhel NV.** 1998. A putative vacuolar cargo receptor partially colocalizes with AtPEP12p on a prevacuolar compartment in Arabidopsis roots. *Proceedings of the National Academy of Sciences, USA* **95**, 9920–9925.

**Sassi A, Mieulet D, Khan I, Moreau B.** 2012. The rice monovalent cation transporter OsHKT2;4: revisited ionic selectivity. *Plant Physiology* **160**, 498–510.

**Sato K, Nakano A.** 2003. Oligomerization of a cargo receptor directs protein sorting into COPII-coated transport vesicles. *Molecular Biology of the Cell* **14**, 3055–3063.

**Schroeder JI, Delhaize E, Frommer WB, et al.** 2013. Using membrane transporters to improve crops for sustainable food production. *Nature* **497**, 60–66.

**Schwenk J, Harmel N, Zolles G, et al.** 2009. Functional proteomics identify cornichon proteins as auxiliary subunits of AMPA receptors. *Science* **323**, 1313–1319.

**Shimaoka T, Ohnishi M, Sazuka T, Mitsuhashi N, Hara-Nishimura I, Shimazaki K-I, Maeshima M, Yokota A, Tomizawa K-I, Mimura T.** 2004. Isolation of intact vacuoles and proteomic analysis of tonoplast from suspension-cultured cells of *Arabidopsis thaliana*. *Plant and Cell Physiology* **45**, 672–83.

**Strompen G, Dettmer J, Stierhof Y-D, Schumacher K, Jurgens G, Mayer U, Jürgens G.** 2005. Arabidopsis vacuolar H-ATPase subunit E isoform 1 is required for Golgi organization and vacuole function in embryogenesis. *The Plant Journal* **41**, 125–32.

**Sunarpi, Horie T, Motoda J, et al.** 2005. Enhanced salt tolerance mediated by AtHKT1 transporter-induced Na<sup>+</sup> unloading from xylem vessels to xylem parenchyma cells. *The Plant Journal* **44**, 928–938.

**Tse Y, Mo B, Hillmer S, Zhao M.** 2004. Identification of multivesicular bodies as prevacuolar compartments in *Nicotiana tabacum* BY-2 cells. *The Plant Cell* **16**, 672–693.

**Uozumi N, Kim EJ, Rubio F, Yamaguchi T, Muto S, Tsuboi A, Bakker EP, Nakamura T, Schroeder JI.** 2000. The Arabidopsis HKT1 gene homolog mediates inward Na<sup>+</sup> currents in *Xenopus laevis* oocytes and Na<sup>+</sup> uptake in *Saccharomyces cerevisiae*. *Plant Physiology* **122**, 1249–1259.

**von Heijne G.** 1992. Membrane hydrophobicity protein structure prediction analysis and the positive-inside rule. *Journal of Molecular Biology* **225**, 487–494.

**Wang H, Zhuang X-H, Hillmer S, Robinson DG, Jiang L-W.** 2011. Vacuolar sorting receptor (VSR) proteins reach the plasma membrane in germinating pollen tubes. *Molecular Plant* **4**, 845–853.

**Wang X, Zhang X, Dong X-P, et al.** 2012. TPC proteins are phosphoinositide-activated sodium-selective ion channels in endosomes and lysosomes. *Cell* **151**, 372–383.

**Wolfenstetter S, Wirsching P, Dotzauer D, Schneider S, Sauer N.** 2012. Routes to the tonoplast: the sorting of tonoplast transporters in Arabidopsis mesophyll protoplasts. *The Plant Cell* **24**, 215–232.

**Woodhull AM.** 1973. Ionic blockage of sodium channels in nerve. *Journal of General Physiology* **61**, 687–708.

**Wudick MM, Luu DD-T, Maurel C.** 2009. A look inside: localization patterns and functions of intracellular plant aquaporins. *New Phytologist* **184**, 289–302.

**Xue S, Yao X, Luo W, Jha D, Tester M, Horie T, Schroeder JI.** 2011. AtHKT1;1 mediates nernstian sodium channel transport properties in Arabidopsis root stelar cells. *PLoS One* **6**, e24725.

**Yao X, Horie T, Xue S, Leung H-Y, Katsuhara M, Brodsky DE, Wu Y, Schroeder JI.** 2010. Differential sodium and potassium transport selectivities of the rice OsHKT2;1 and OsHKT2;2 transporters in plant cells. *Plant Physiology* **152**, 341–355.

**Yokoi S, Quintero FJ, Cubero B, Ruiz MT, Bressan RA, Hasegawa PM, Pardo JM.** 2002. Differential expression and function of Arabidopsis thaliana NHX Na<sup>+</sup>/H<sup>+</sup> antiporters in the salt stress response. *The Plant Journal* **30**, 529–539.
